# Supplementary material for: Substantially Altered Expression Profile of Diabetes/Cardiovascular/Cerebrovascular Disease Associated microRNAs in Children Descending from Pregnancy Complicated by Gestational Diabetes Mellitus—One of Several Possible Reasons for an Increased Cardiovascular Risk
Source: PubMed Central journal article supplement (PMC7349356; doi:10.3390/cells9061557), 2020-06-26
Supplement: cells-09-01557-s001.pdf [file cells-09-01557-s001.pdf]

Supplementary Material

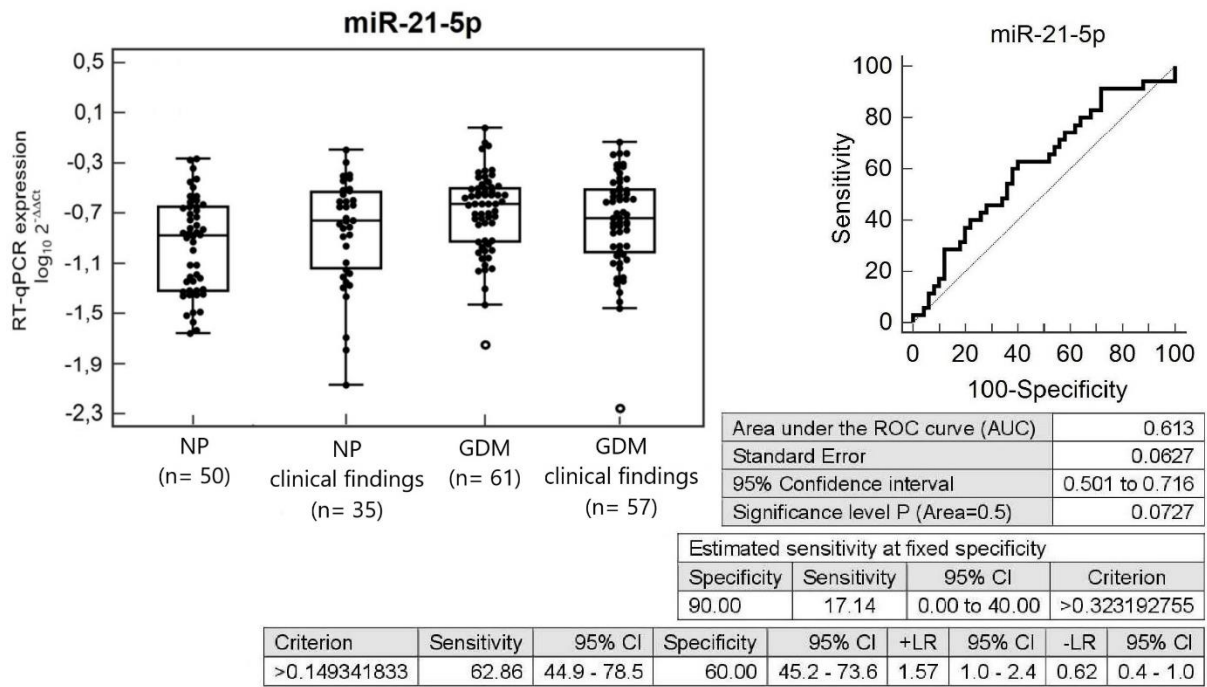

**Supplementary Figure S1:** Aberrant microRNA expression profile in children descending from normal pregnancies. A trend towards up-regulation of miR-21-5p was observed in children with abnormal clinical findings when the comparison to children with normal clinical findings was performed. NP, normal pregnancies; GDM, gestational diabetes mellitus.

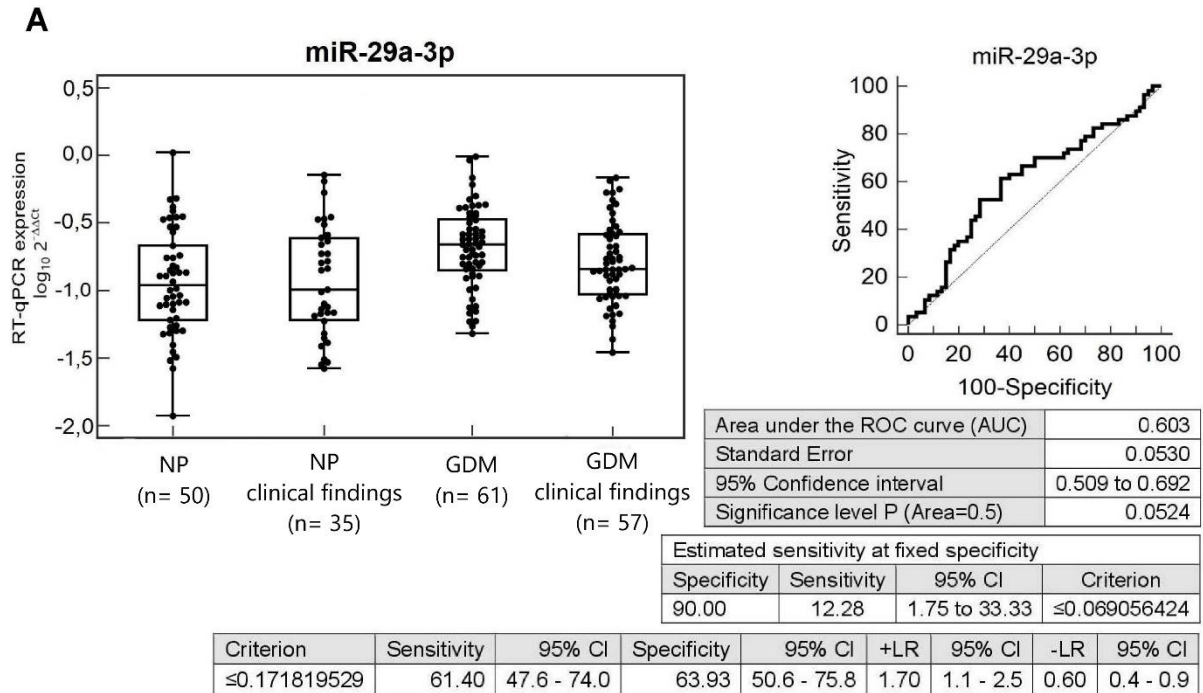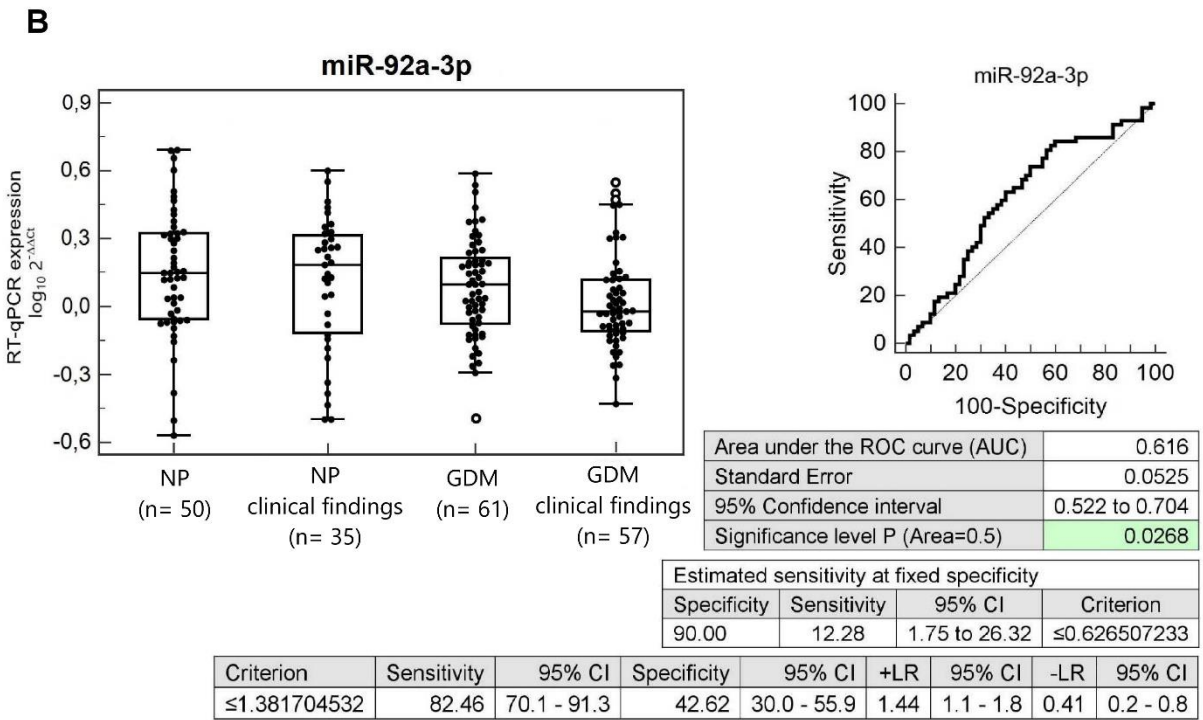

**Supplementary Figure S2:** Aberrant microRNA expression profile in children descending from GDM complicated pregnancies. (A,B) Down-regulation of miR-29a-3p and miR-92a-3p was observed in children with abnormal clinical findings when the comparison to children with normal clinical findings was performed. NP, normal pregnancies; GDM, gestational diabetes mellitus.

**A**

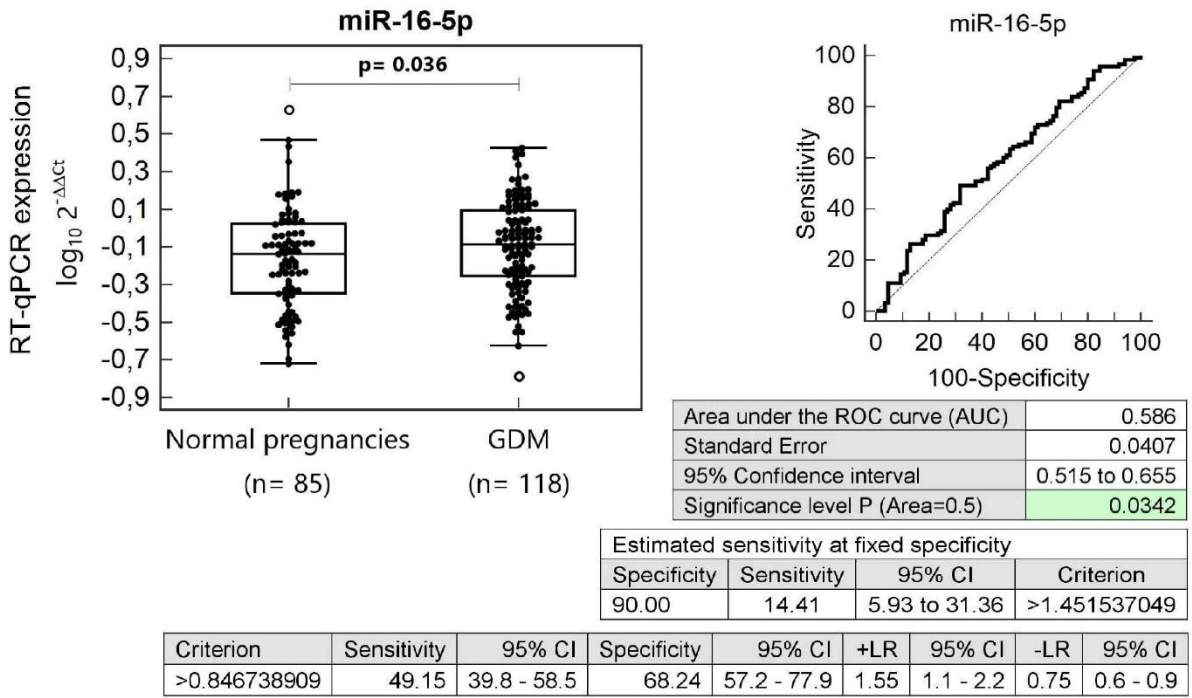

**B**

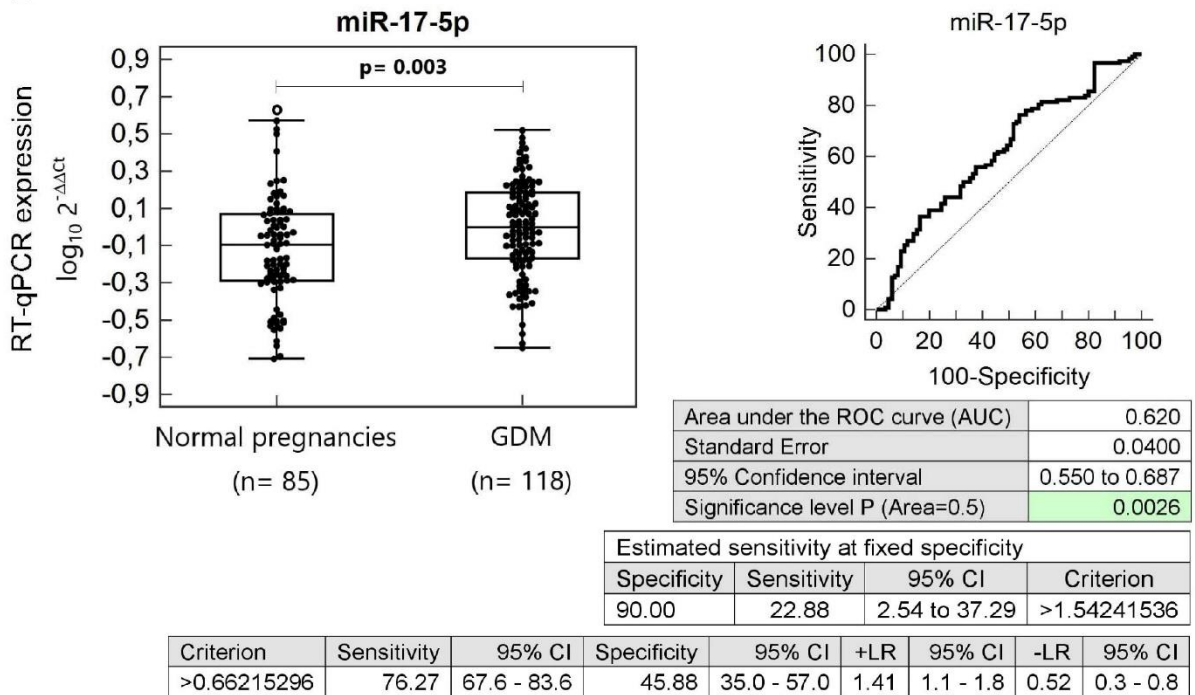

**C**

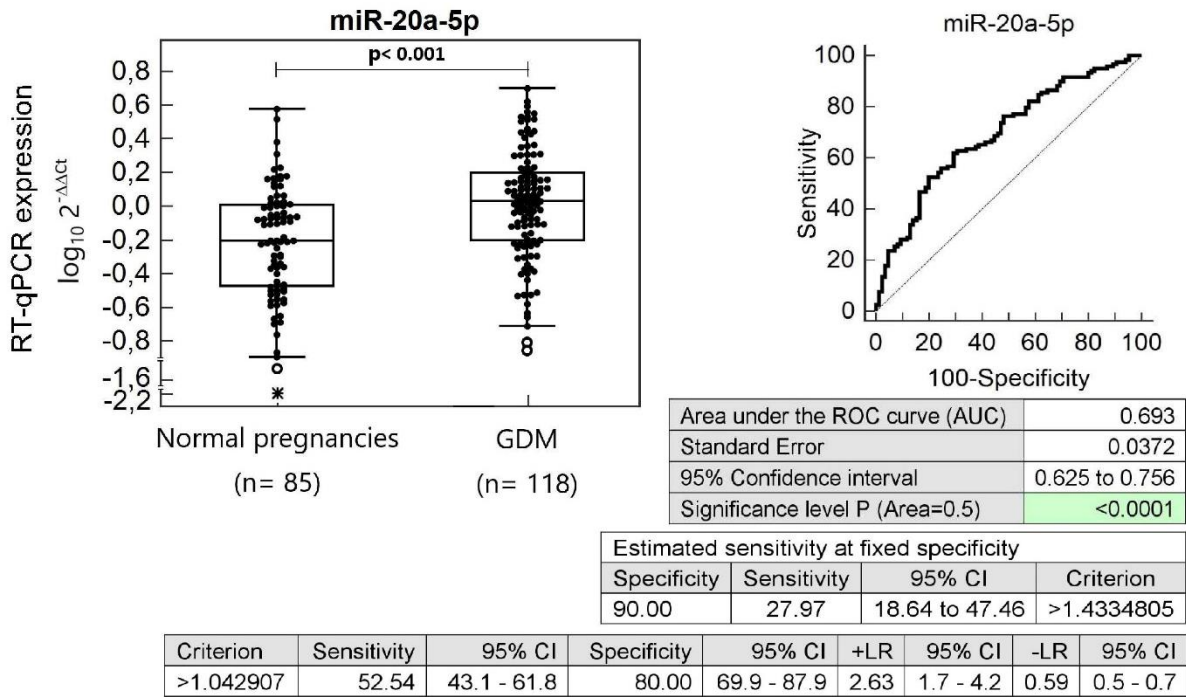

**D**

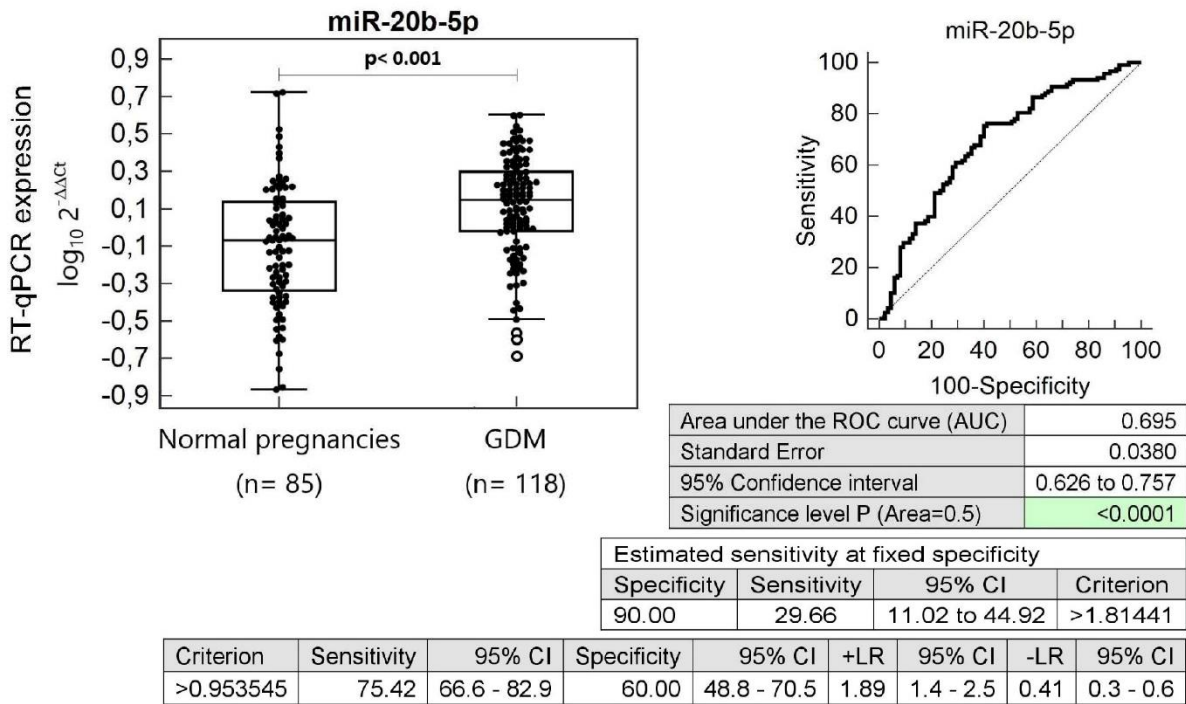



**E**

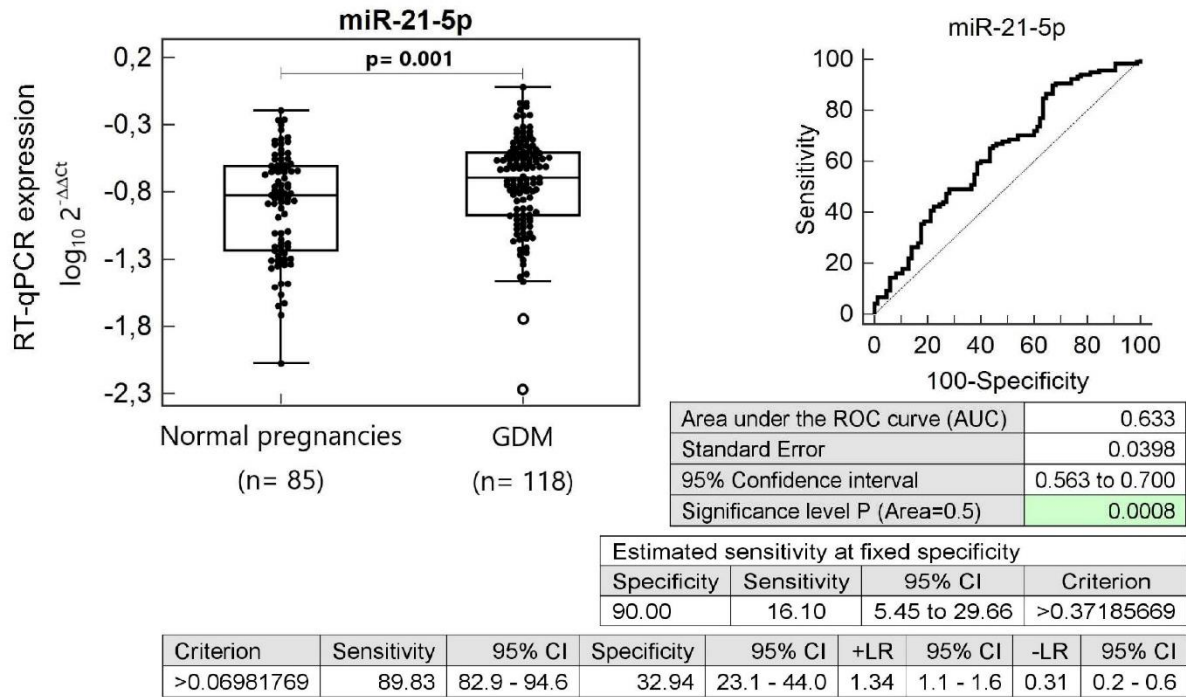

**F**

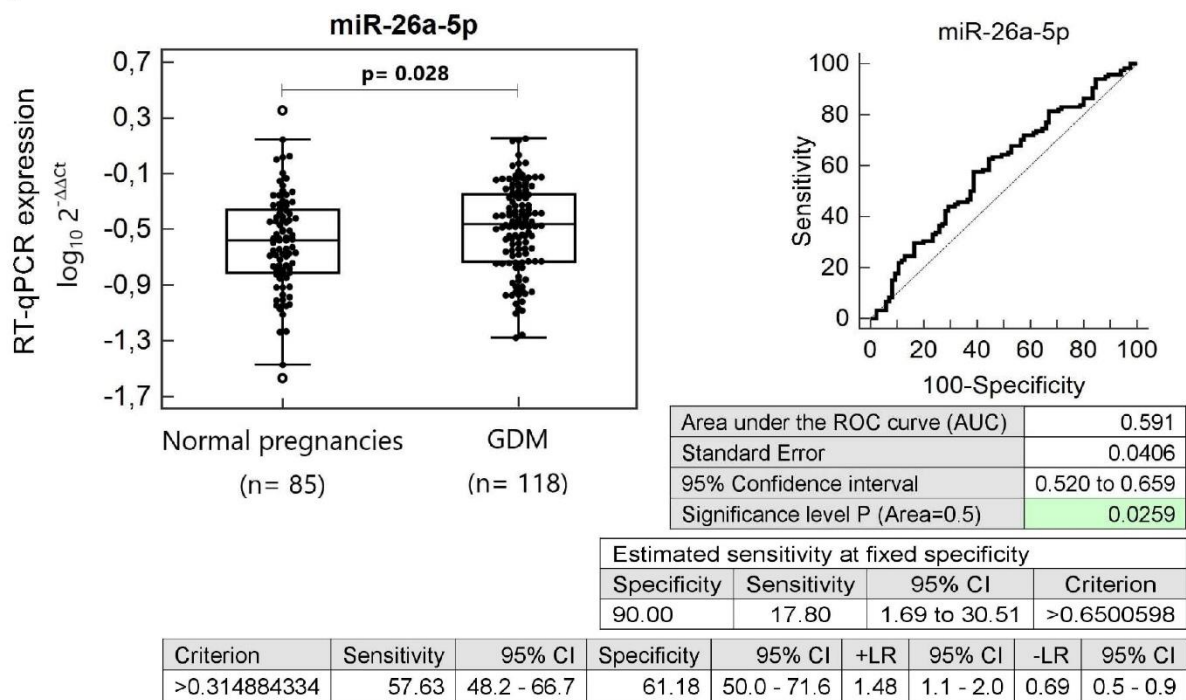

**G**

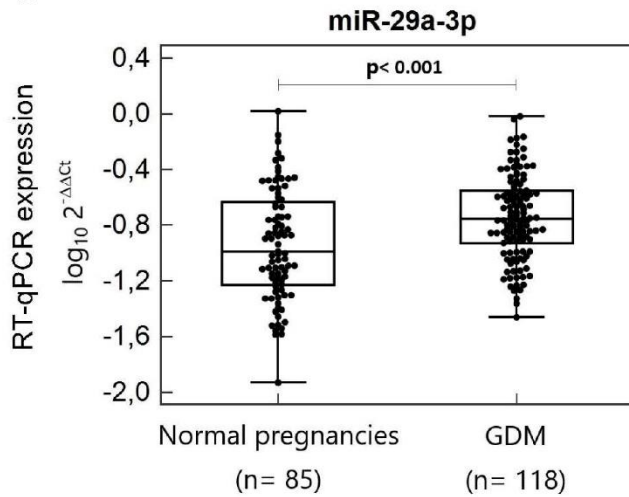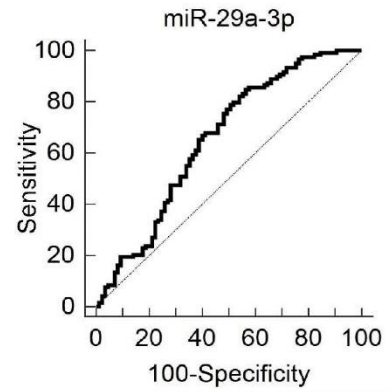

|                                 |                |
|---------------------------------|----------------|
| Area under the ROC curve (AUC)  | 0.653          |
| Standard Error                  | 0.0404         |
| 95% Confidence interval         | 0.583 to 0.718 |
| Significance level P (Area=0.5) | 0.0002         |

| Estimated sensitivity at fixed specificity |             |                |              |
|--------------------------------------------|-------------|----------------|--------------|
| Specificity                                | Sensitivity | 95% CI         | Criterion    |
| 90.00                                      | 19.49       | 11.02 to 32.84 | >0.349486706 |

| Criterion    | Sensitivity | 95% CI      | Specificity | 95% CI      | +LR  | 95% CI    | -LR  | 95% CI    |
|--------------|-------------|-------------|-------------|-------------|------|-----------|------|-----------|
| >0.086833444 | 84.75       | 77.0 - 90.7 | 43.53       | 32.8 - 54.7 | 1.50 | 1.2 - 1.8 | 0.35 | 0.2 - 0.6 |

**H**

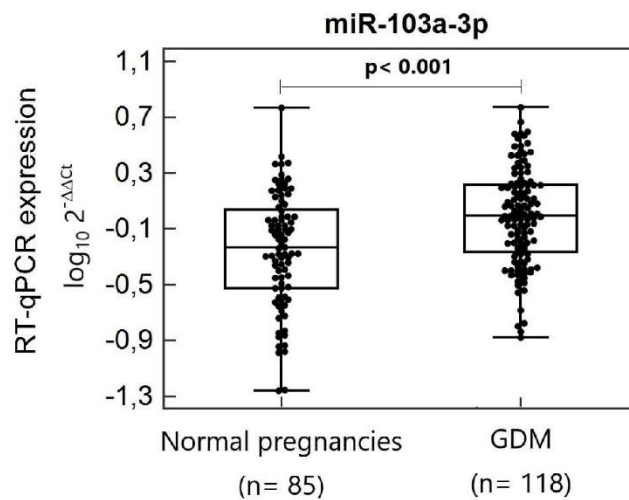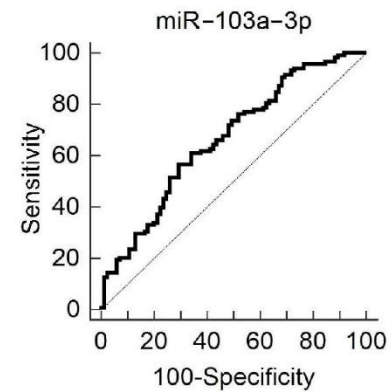

|                                 |                |
|---------------------------------|----------------|
| Area under the ROC curve (AUC)  | 0.665          |
| Standard Error                  | 0.0386         |
| 95% Confidence interval         | 0.596 to 0.730 |
| Significance level P (Area=0.5) | <0.0001        |

| Estimated sensitivity at fixed specificity |             |               |              |
|--------------------------------------------|-------------|---------------|--------------|
| Specificity                                | Sensitivity | 95% CI        | Criterion    |
| 90.00                                      | 20.34       | 7.63 to 31.36 | >1.755066833 |

| Criterion    | Sensitivity | 95% CI      | Specificity | 95% CI      | +LR  | 95% CI    | -LR  | 95% CI    |
|--------------|-------------|-------------|-------------|-------------|------|-----------|------|-----------|
| >0.912860441 | 56.78       | 47.3 - 65.9 | 70.59       | 59.7 - 80.0 | 1.93 | 1.3 - 2.8 | 0.61 | 0.5 - 0.8 |

I

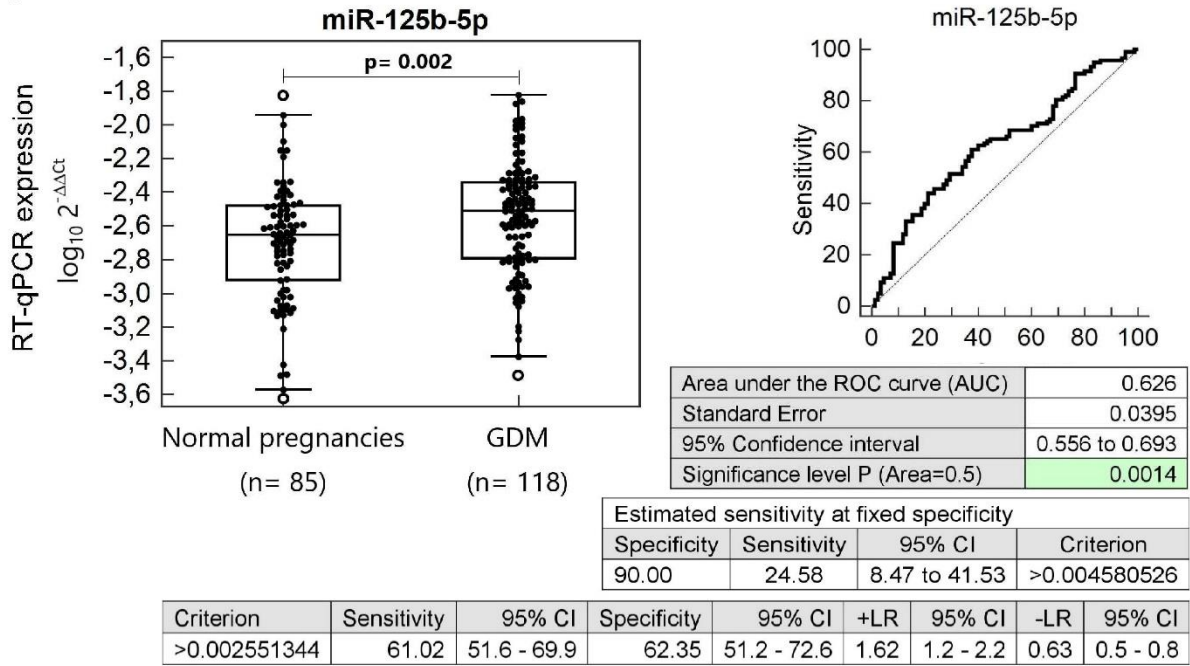

J

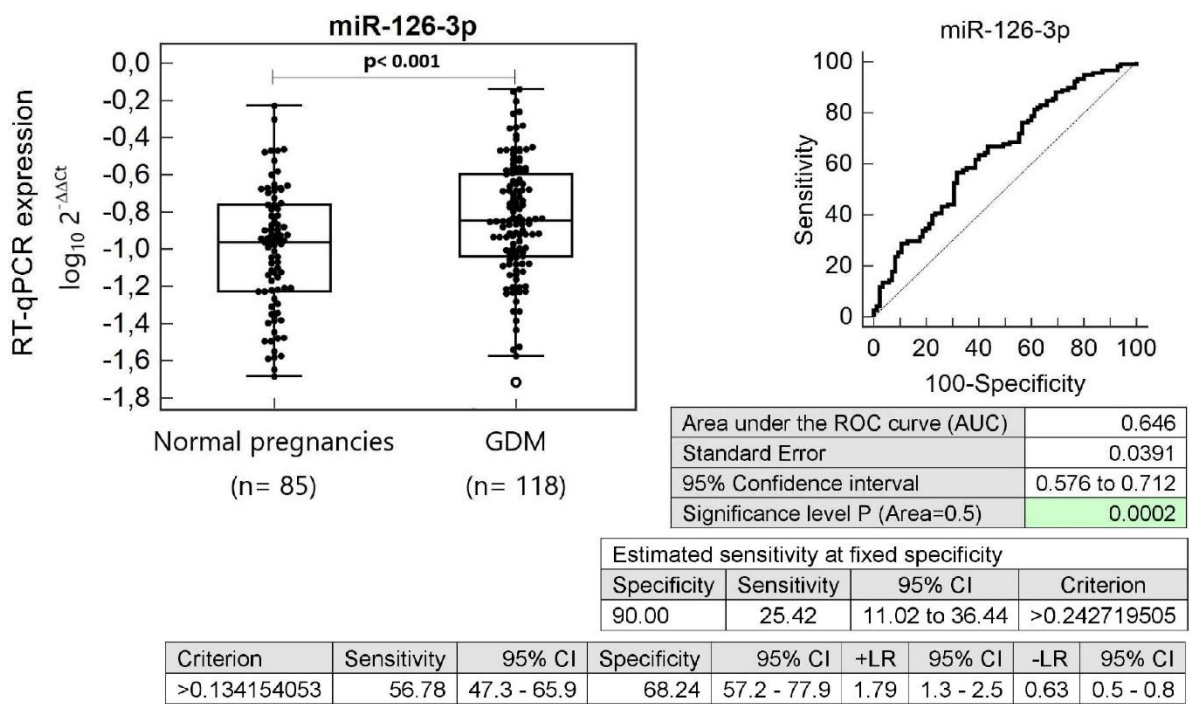

**K**

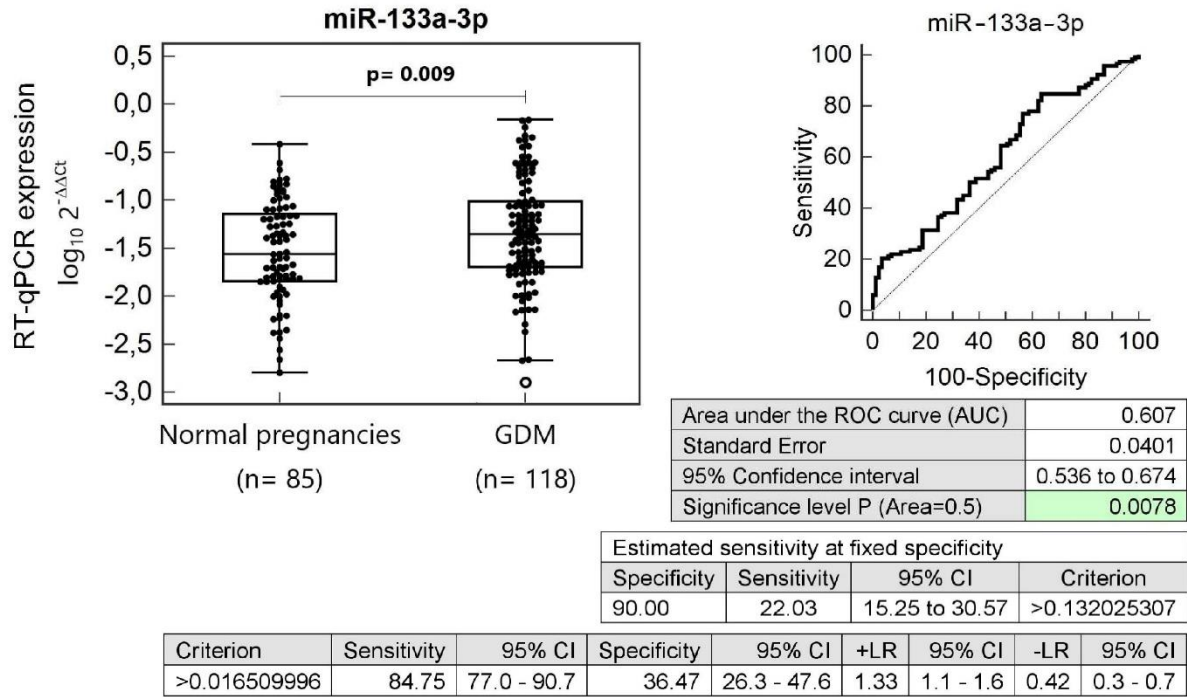

**L**

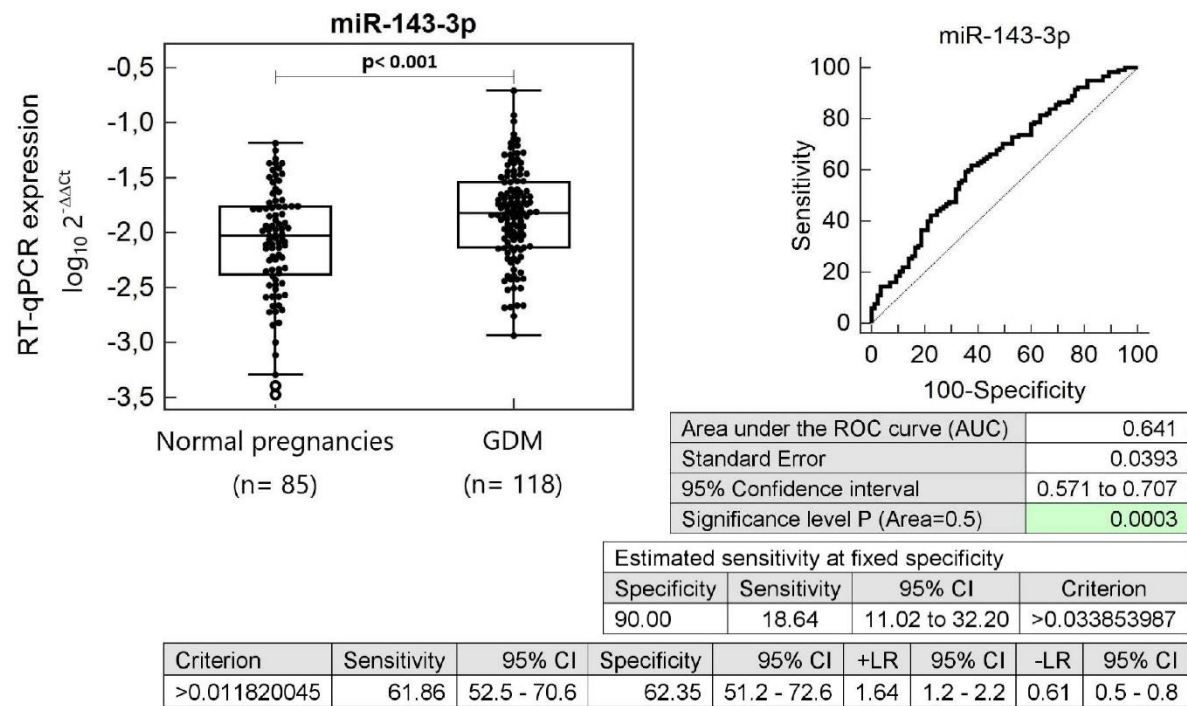

**M**

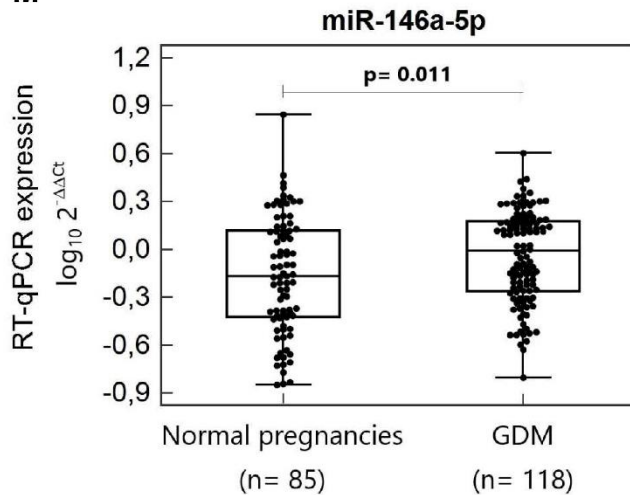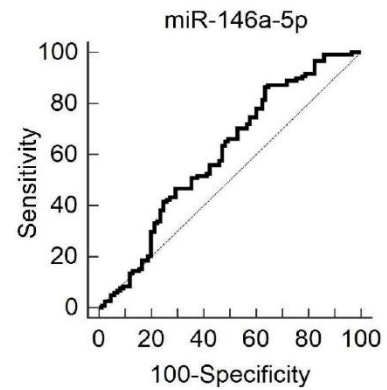

|                                 |                |
|---------------------------------|----------------|
| Area under the ROC curve (AUC)  | 0.604          |
| Standard Error                  | 0.0414         |
| 95% Confidence interval         | 0.534 to 0.672 |
| Significance level P (Area=0.5) | 0.0117         |

| Estimated sensitivity at fixed specificity |             |               |              |
|--------------------------------------------|-------------|---------------|--------------|
| Specificity                                | Sensitivity | 95% CI        | Criterion    |
| 90.00                                      | 8.47        | 2.54 to 20.34 | >1.977850467 |

| Criterion    | Sensitivity | 95% CI      | Specificity | 95% CI      | +LR  | 95% CI    | -LR  | 95% CI    |
|--------------|-------------|-------------|-------------|-------------|------|-----------|------|-----------|
| >0.421913076 | 86.44       | 78.9 - 92.0 | 36.47       | 26.3 - 47.6 | 1.36 | 1.1 - 1.6 | 0.37 | 0.2 - 0.6 |

**N**

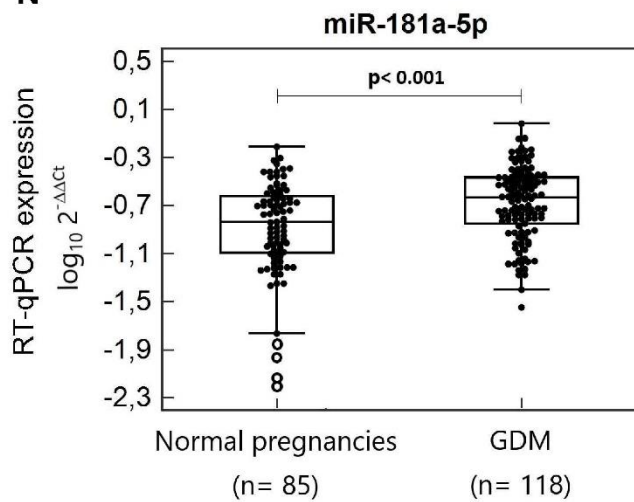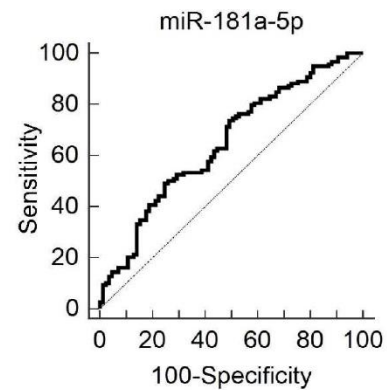

|                                 |                |
|---------------------------------|----------------|
| Area under the ROC curve (AUC)  | 0.647          |
| Standard Error                  | 0.0392         |
| 95% Confidence interval         | 0.577 to 0.712 |
| Significance level P (Area=0.5) | 0.0002         |

| Estimated sensitivity at fixed specificity |             |               |              |
|--------------------------------------------|-------------|---------------|--------------|
| Specificity                                | Sensitivity | 95% CI        | Criterion    |
| 90.00                                      | 16.10       | 5.93 to 28.70 | >0.378978361 |

| Criterion    | Sensitivity | 95% CI      | Specificity | 95% CI      | +LR  | 95% CI    | -LR  | 95% CI    |
|--------------|-------------|-------------|-------------|-------------|------|-----------|------|-----------|
| >0.234382158 | 49.15       | 39.8 - 58.5 | 75.29       | 64.7 - 84.0 | 1.99 | 1.3 - 3.0 | 0.68 | 0.5 - 0.8 |



**O**

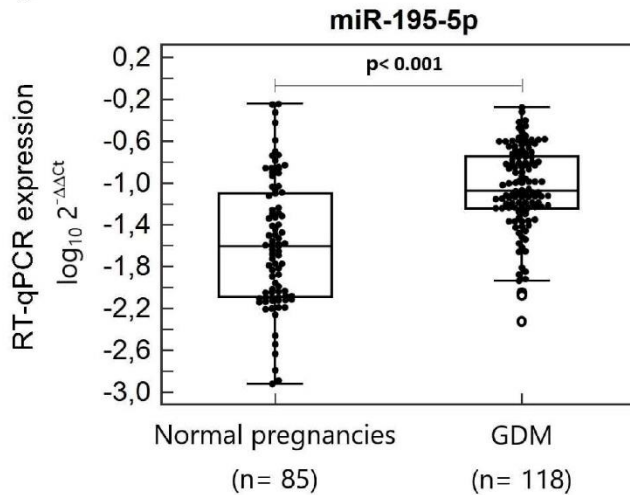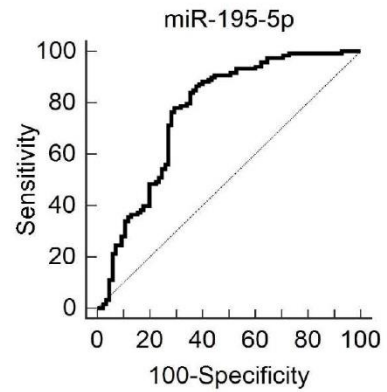

|                                 |                |
|---------------------------------|----------------|
| Area under the ROC curve (AUC)  | 0.765          |
| Standard Error                  | 0.0361         |
| 95% Confidence interval         | 0.700 to 0.821 |
| Significance level P (Area=0.5) | <0.0001        |

| Estimated sensitivity at fixed specificity |             |               |              |
|--------------------------------------------|-------------|---------------|--------------|
| Specificity                                | Sensitivity | 95% CI        | Criterion    |
| 90.00                                      | 27.97       | 2.54 to 41.53 | >0.162032225 |

| Criterion    | Sensitivity | 95% CI      | Specificity | 95% CI      | +LR  | 95% CI    | -LR  | 95% CI    |
|--------------|-------------|-------------|-------------|-------------|------|-----------|------|-----------|
| >0.036219298 | 86.44       | 78.9 - 92.0 | 62.35       | 51.2 - 72.6 | 2.30 | 1.7 - 3.0 | 0.22 | 0.1 - 0.4 |

**P**

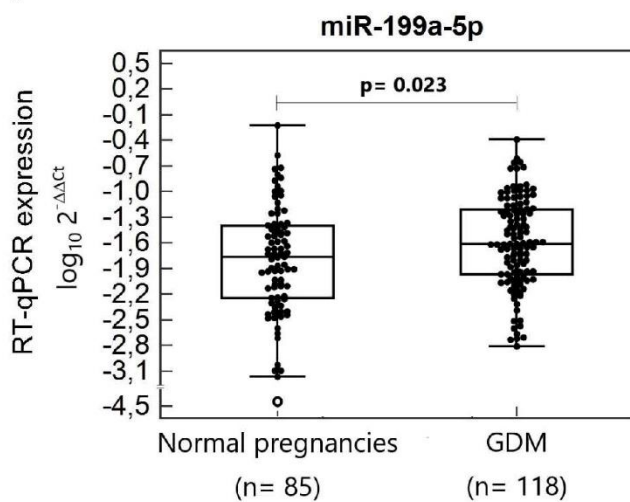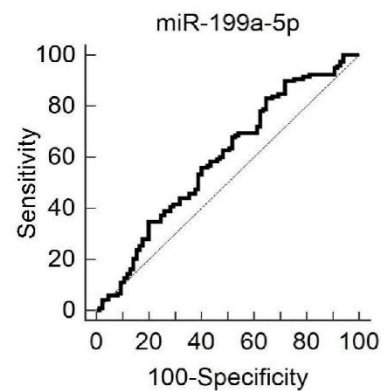

|                                 |                |
|---------------------------------|----------------|
| Area under the ROC curve (AUC)  | 0.594          |
| Standard Error                  | 0.0410         |
| 95% Confidence interval         | 0.523 to 0.662 |
| Significance level P (Area=0.5) | 0.0223         |

| Estimated sensitivity at fixed specificity |             |               |              |
|--------------------------------------------|-------------|---------------|--------------|
| Specificity                                | Sensitivity | 95% CI        | Criterion    |
| 90.00                                      | 11.02       | 3.39 to 28.81 | >0.101728811 |

| Criterion    | Sensitivity | 95% CI      | Specificity | 95% CI      | +LR  | 95% CI    | -LR  | 95% CI    |
|--------------|-------------|-------------|-------------|-------------|------|-----------|------|-----------|
| >0.008308903 | 83.05       | 75.0 - 89.3 | 35.29       | 25.2 - 46.4 | 1.28 | 1.1 - 1.5 | 0.48 | 0.3 - 0.8 |

**Q**

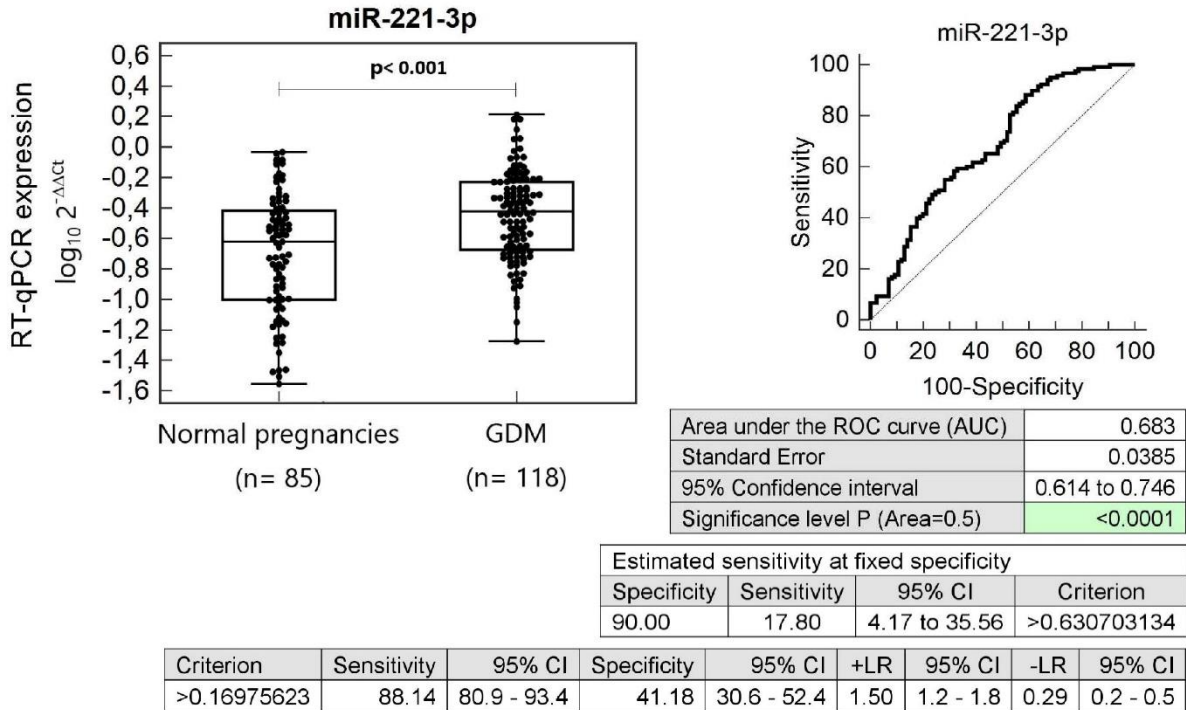

**R**

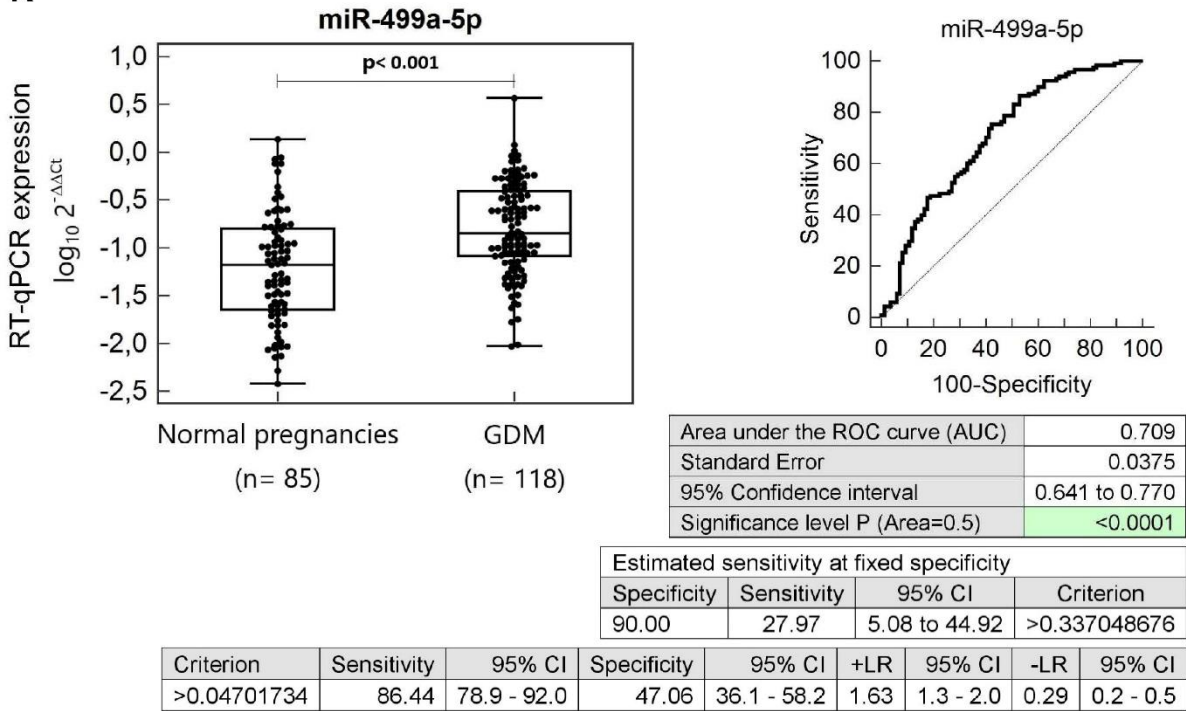

**S**

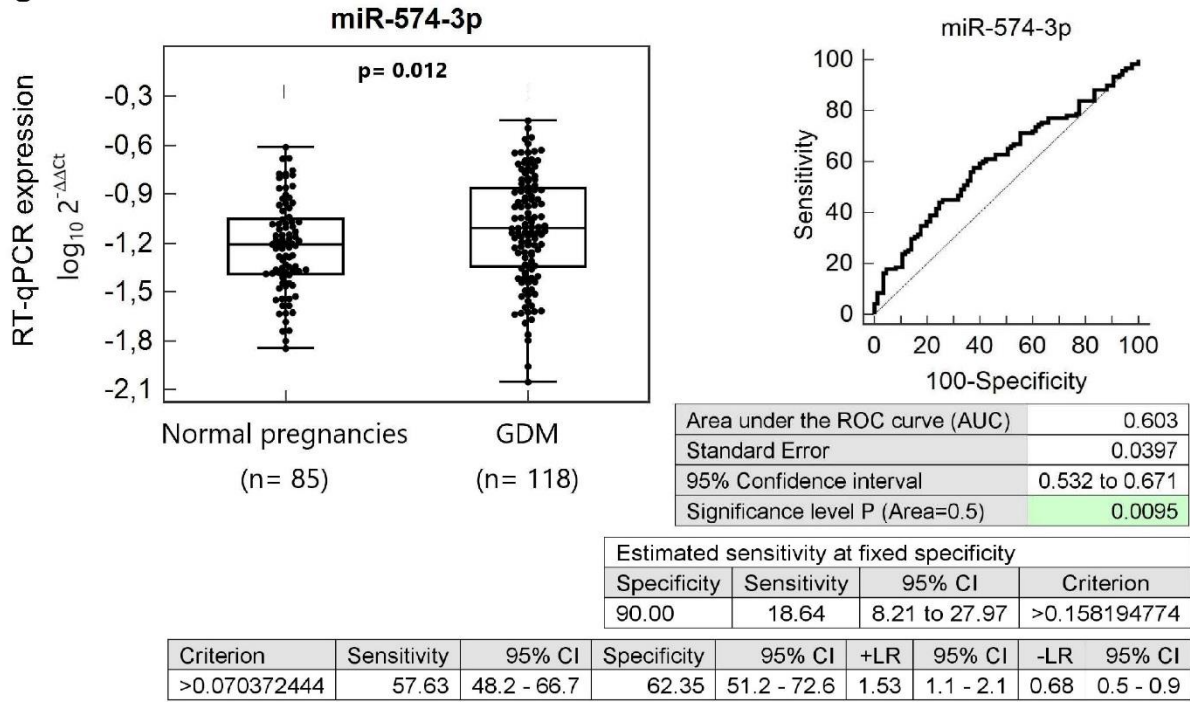

**T**

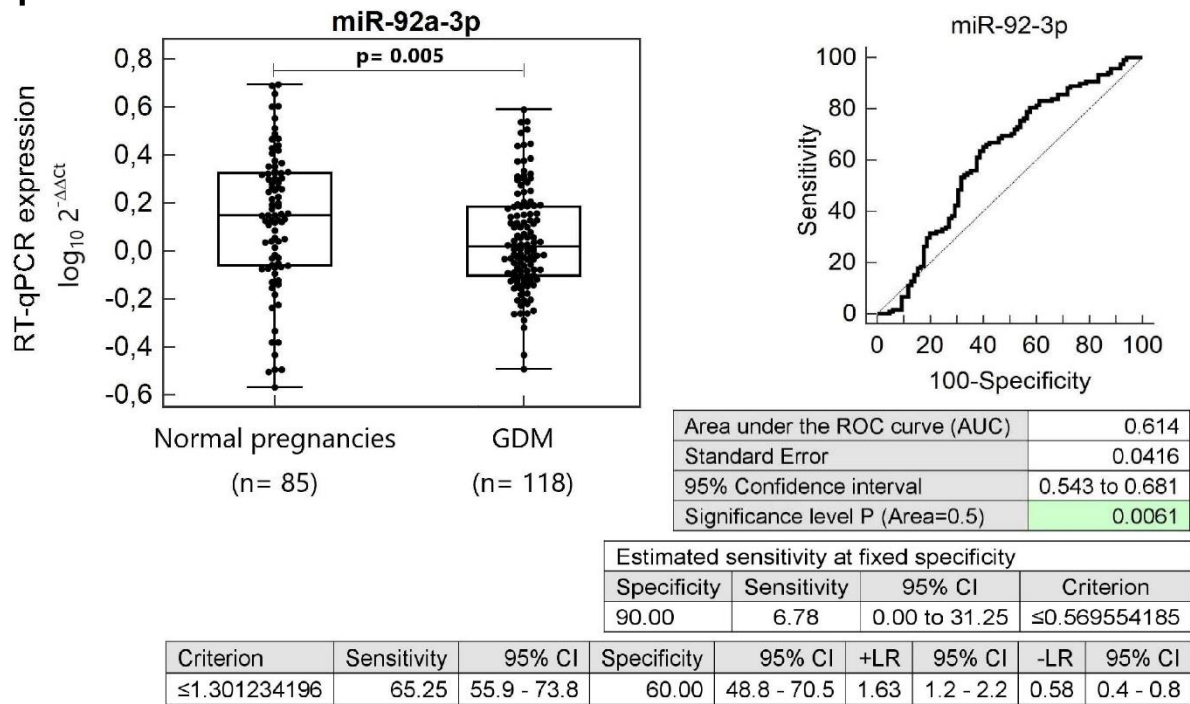

**U**

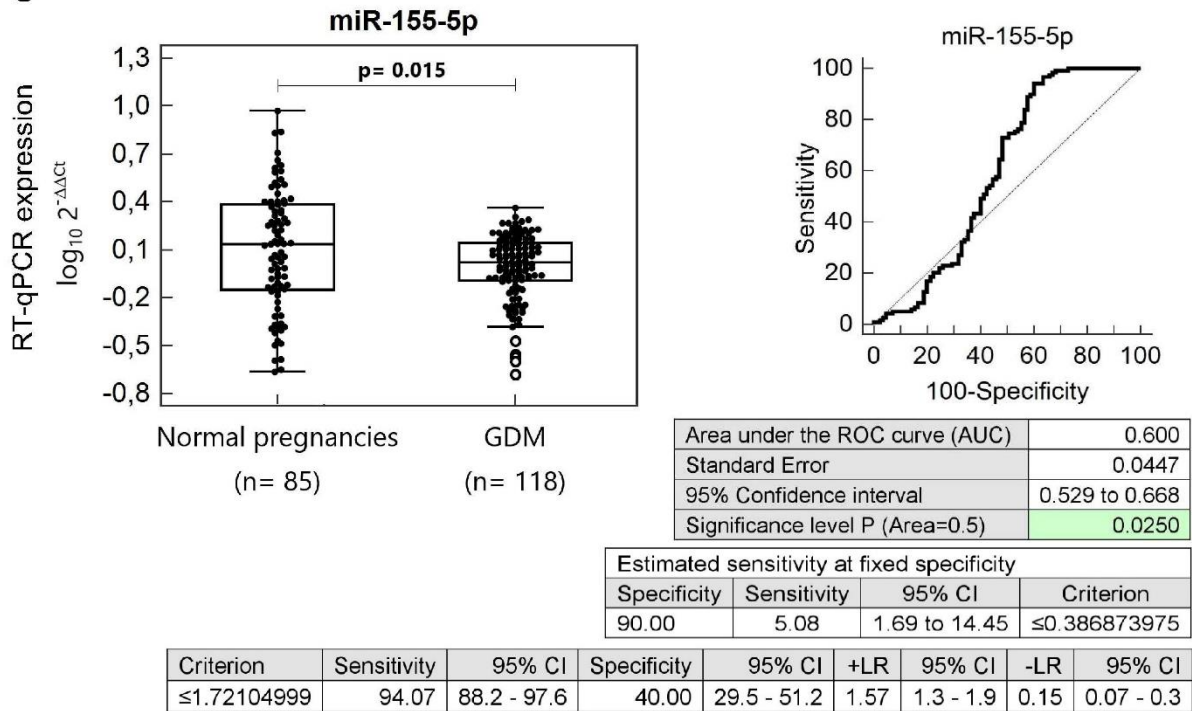

**V**

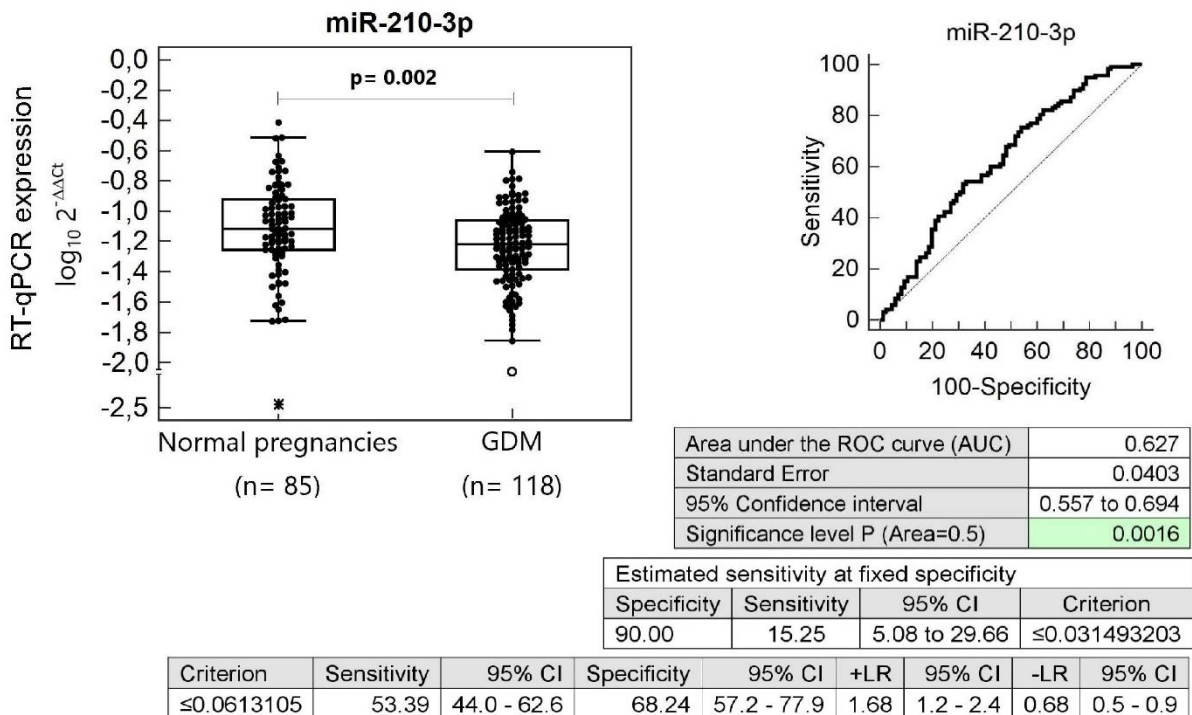

**Supplementary Figure S3:** Aberrant microRNA expression profile in children descending from GDM complicated pregnancies irrespective of the clinical findings (overweight/obesity, prehypertension/hypertension, and/or valve problems and heart defects). (A–S) Up-regulation of miR-16-5p, miR-17-5p, miR-20a-5p, miR-20b-5p, miR-21-5p, miR-26a-5p, miR-29a-3p, miR-103a-3p, miR-125b-5p, miR-126-3p, miR-133a-3p, miR-143-3p, miR-146a-5p, miR-181a-5p, miR-195-5p, miR-199a-5p, miR-221-3p, miR-499a-5p, and miR-574-3p and (T–V) down-regulation of miR-92a-3p, miR-155-5p, and miR-210-3p was observed in children descending from GDM complicated pregnancies when the comparison to the controls irrespective of the clinical findings was performed. GDM, gestational diabetes mellitus.



**A**

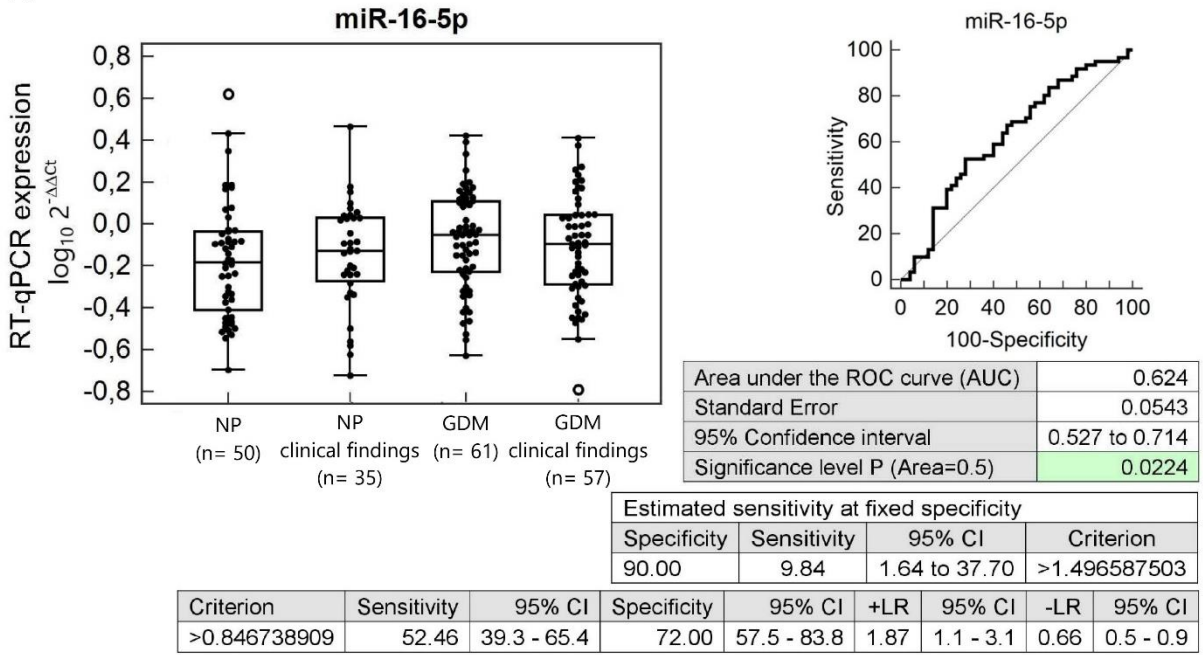

**B**

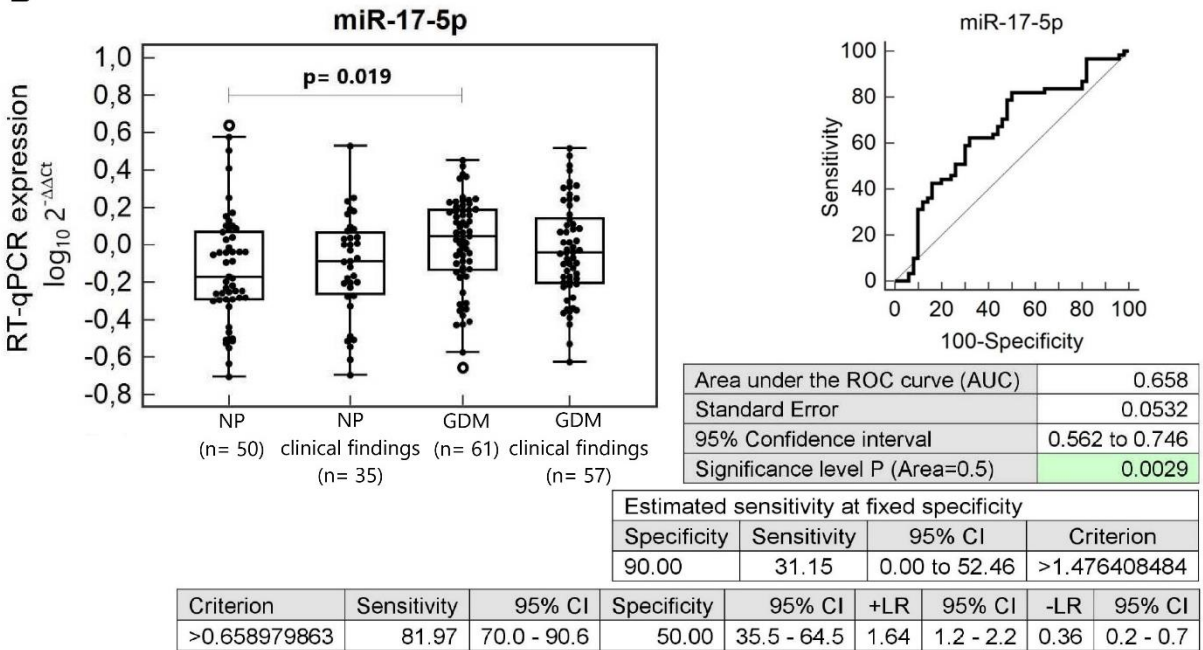



**C**

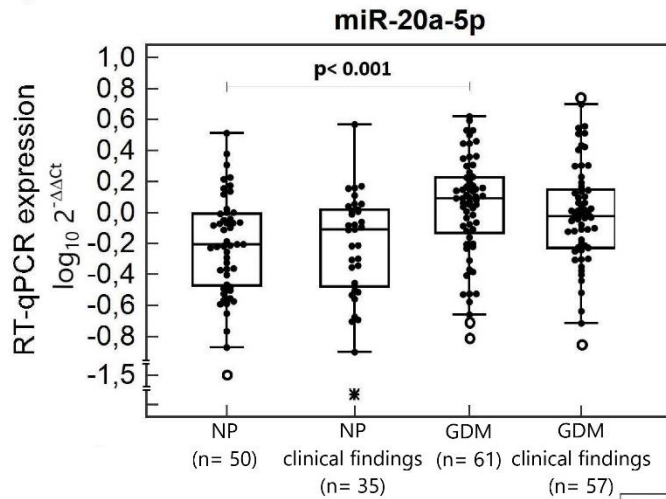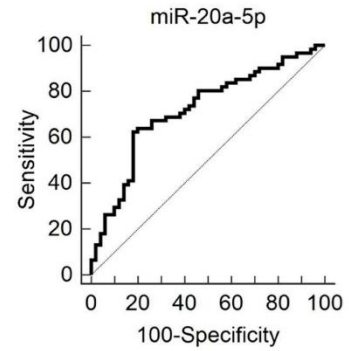

|                                 |                |
|---------------------------------|----------------|
| Area under the ROC curve (AUC)  | 0.719          |
| Standard Error                  | 0.0493         |
| 95% Confidence interval         | 0.626 to 0.800 |
| Significance level P (Area=0.5) | <0.0001        |

| Estimated sensitivity at fixed specificity |             |                |           |
|--------------------------------------------|-------------|----------------|-----------|
| Specificity                                | Sensitivity | 95% CI         | Criterion |
| 90.00                                      | 29.51       | 11.48 to 60.66 | >1.481534 |

| Criterion | Sensitivity | 95% CI      | Specificity | 95% CI      | +LR  | 95% CI    | -LR  | 95% CI    |
|-----------|-------------|-------------|-------------|-------------|------|-----------|------|-----------|
| >1.042907 | 62.30       | 49.0 - 74.4 | 82.00       | 68.6 - 91.4 | 3.46 | 1.9 - 6.5 | 0.46 | 0.3 - 0.7 |

**D**

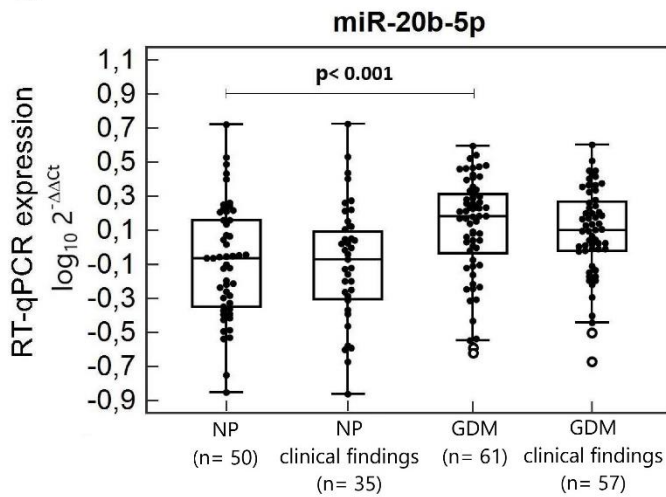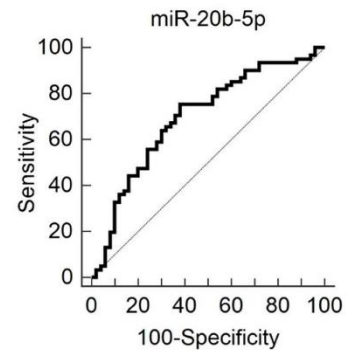

|                                 |                |
|---------------------------------|----------------|
| Area under the ROC curve (AUC)  | 0.696          |
| Standard Error                  | 0.0511         |
| 95% Confidence interval         | 0.602 to 0.780 |
| Significance level P (Area=0.5) | 0.0001         |

| Estimated sensitivity at fixed specificity |             |               |           |
|--------------------------------------------|-------------|---------------|-----------|
| Specificity                                | Sensitivity | 95% CI        | Criterion |
| 90.00                                      | 32.79       | 4.92 to 55.74 | >1.813608 |

| Criterion | Sensitivity | 95% CI      | Specificity | 95% CI      | +LR  | 95% CI    | -LR  | 95% CI    |
|-----------|-------------|-------------|-------------|-------------|------|-----------|------|-----------|
| >0.895453 | 75.41       | 62.7 - 85.5 | 62.00       | 47.2 - 75.3 | 1.98 | 1.4 - 2.9 | 0.40 | 0.2 - 0.6 |

**E**

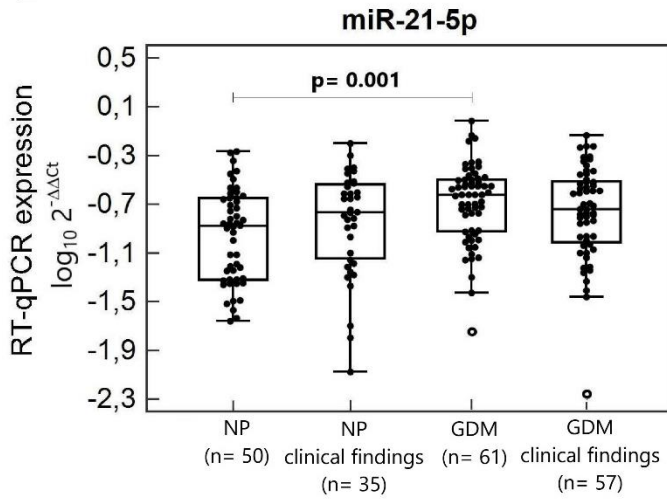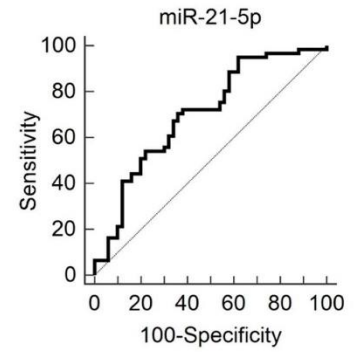

|                                 |                |
|---------------------------------|----------------|
| Area under the ROC curve (AUC)  | 0.703          |
| Standard Error                  | 0.0505         |
| 95% Confidence interval         | 0.608 to 0.786 |
| Significance level P (Area=0.5) | 0.0001         |

| Estimated sensitivity at fixed specificity |             |               |              |
|--------------------------------------------|-------------|---------------|--------------|
| Specificity                                | Sensitivity | 95% CI        | Criterion    |
| 90.00                                      | 21.31       | 4.92 to 50.82 | >0.323192755 |

| Criterion    | Sensitivity | 95% CI      | Specificity | 95% CI      | +LR  | 95% CI    | -LR  | 95% CI    |
|--------------|-------------|-------------|-------------|-------------|------|-----------|------|-----------|
| >0.160926828 | 70.49       | 57.4 - 81.5 | 64.00       | 49.2 - 77.1 | 1.96 | 1.3 - 2.9 | 0.46 | 0.3 - 0.7 |

**F**

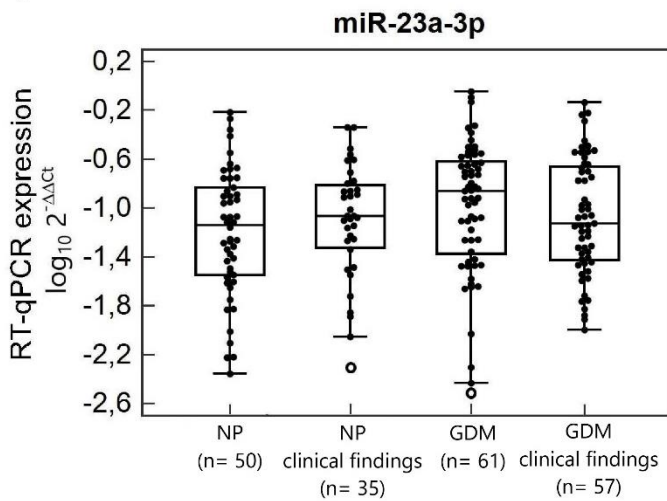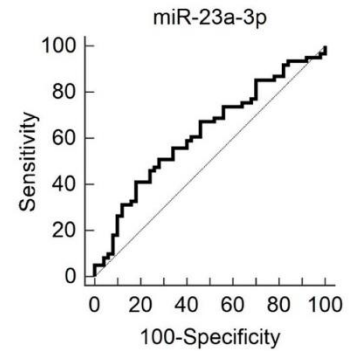

|                                 |                |
|---------------------------------|----------------|
| Area under the ROC curve (AUC)  | 0.622          |
| Standard Error                  | 0.0535         |
| 95% Confidence interval         | 0.525 to 0.712 |
| Significance level P (Area=0.5) | 0.0231         |

| Estimated sensitivity at fixed specificity |             |               |              |
|--------------------------------------------|-------------|---------------|--------------|
| Specificity                                | Sensitivity | 95% CI        | Criterion    |
| 90.00                                      | 26.23       | 6.56 to 47.54 | >0.229132348 |

| Criterion    | Sensitivity | 95% CI      | Specificity | 95% CI      | +LR  | 95% CI    | -LR  | 95% CI    |
|--------------|-------------|-------------|-------------|-------------|------|-----------|------|-----------|
| >0.176739191 | 40.98       | 28.6 - 54.3 | 82.00       | 68.6 - 91.4 | 2.28 | 1.2 - 4.4 | 0.72 | 0.6 - 0.9 |

**G**

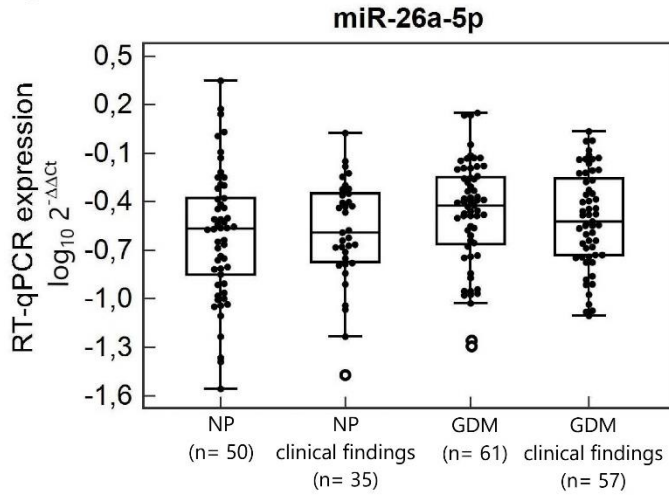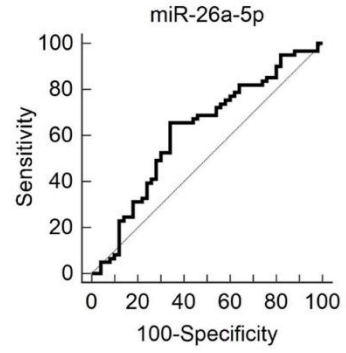

|                                 |                |
|---------------------------------|----------------|
| Area under the ROC curve (AUC)  | 0.619          |
| Standard Error                  | 0.0547         |
| 95% Confidence interval         | 0.522 to 0.710 |
| Significance level P (Area=0.5) | 0.0292         |

| Estimated sensitivity at fixed specificity |             |               |              |
|--------------------------------------------|-------------|---------------|--------------|
| Specificity                                | Sensitivity | 95% CI        | Criterion    |
| 90.00                                      | 8.20        | 0.00 to 32.79 | >0.746042247 |

| Criterion    | Sensitivity | 95% CI      | Specificity | 95% CI      | +LR  | 95% CI    | -LR  | 95% CI    |
|--------------|-------------|-------------|-------------|-------------|------|-----------|------|-----------|
| >0.314884334 | 65.57       | 52.3 - 77.3 | 66.00       | 51.2 - 78.8 | 1.93 | 1.3 - 3.0 | 0.52 | 0.3 - 0.8 |

**H**

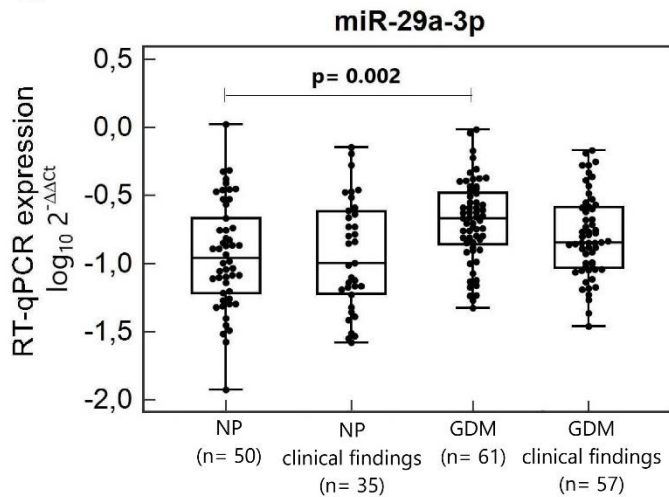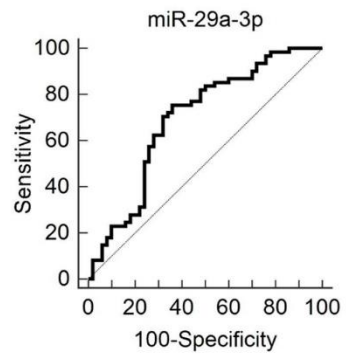

|                                 |                |
|---------------------------------|----------------|
| Area under the ROC curve (AUC)  | 0.693          |
| Standard Error                  | 0.0522         |
| 95% Confidence interval         | 0.599 to 0.777 |
| Significance level P (Area=0.5) | 0.0002         |

| Estimated sensitivity at fixed specificity |             |               |              |
|--------------------------------------------|-------------|---------------|--------------|
| Specificity                                | Sensitivity | 95% CI        | Criterion    |
| 90.00                                      | 22.95       | 9.84 to 55.74 | >0.351278964 |

| Criterion    | Sensitivity | 95% CI      | Specificity | 95% CI      | +LR  | 95% CI    | -LR  | 95% CI    |
|--------------|-------------|-------------|-------------|-------------|------|-----------|------|-----------|
| >0.139968015 | 75.41       | 62.7 - 85.5 | 64.00       | 49.2 - 77.1 | 2.09 | 1.4 - 3.1 | 0.38 | 0.2 - 0.6 |

I

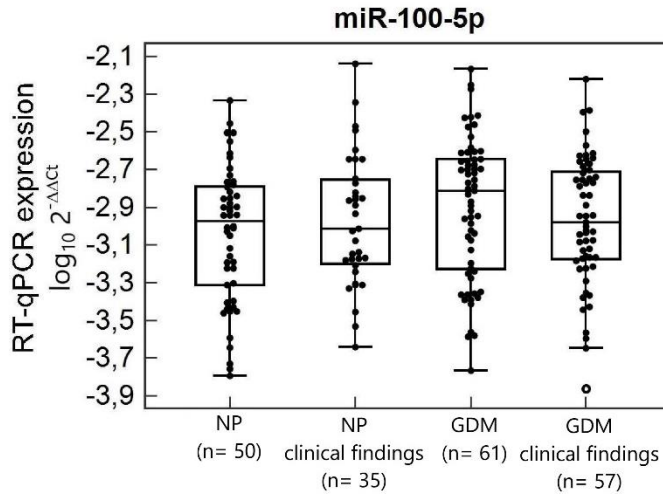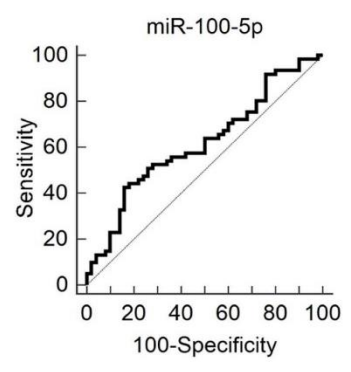

|                                 |                |
|---------------------------------|----------------|
| Area under the ROC curve (AUC)  | 0.617          |
| Standard Error                  | 0.0537         |
| 95% Confidence interval         | 0.520 to 0.708 |
| Significance level P (Area=0.5) | 0.0292         |

| Estimated sensitivity at fixed specificity |             |               |              |
|--------------------------------------------|-------------|---------------|--------------|
| Specificity                                | Sensitivity | 95% CI        | Criterion    |
| 90.00                                      | 22.95       | 8.20 to 52.46 | >0.002435069 |

| Criterion    | Sensitivity | 95% CI      | Specificity | 95% CI      | +LR  | 95% CI    | -LR  | 95% CI    |
|--------------|-------------|-------------|-------------|-------------|------|-----------|------|-----------|
| >0.001860482 | 42.62       | 30.0 - 55.9 | 84.00       | 70.9 - 92.8 | 2.66 | 1.3 - 5.4 | 0.68 | 0.5 - 0.9 |

J

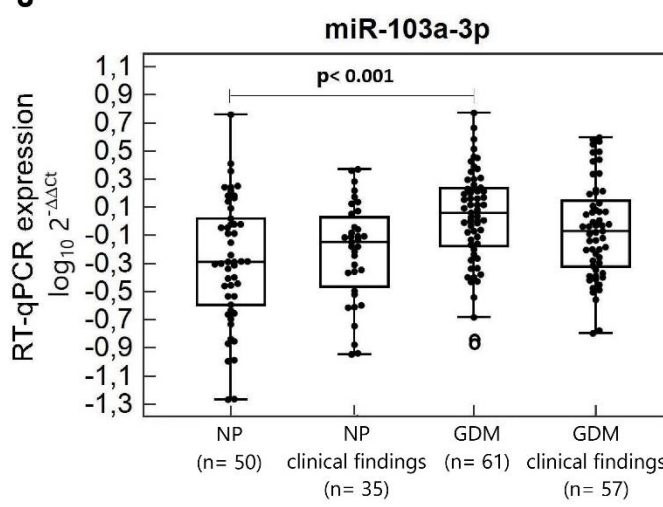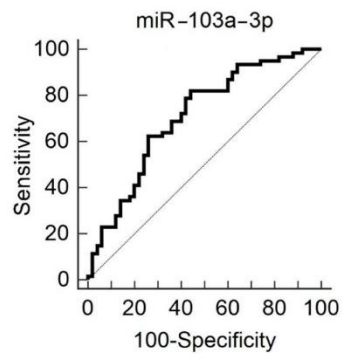

|                                 |                |
|---------------------------------|----------------|
| Area under the ROC curve (AUC)  | 0.708          |
| Standard Error                  | 0.0502         |
| 95% Confidence interval         | 0.614 to 0.791 |
| Significance level P (Area=0.5) | <0.0001        |

| Estimated sensitivity at fixed specificity |             |               |              |
|--------------------------------------------|-------------|---------------|--------------|
| Specificity                                | Sensitivity | 95% CI        | Criterion    |
| 90.00                                      | 22.95       | 8.20 to 38.83 | >1.768871485 |

| Criterion    | Sensitivity | 95% CI      | Specificity | 95% CI      | +LR  | 95% CI    | -LR  | 95% CI    |
|--------------|-------------|-------------|-------------|-------------|------|-----------|------|-----------|
| >0.524775066 | 81.97       | 70.0 - 90.6 | 56.00       | 41.3 - 70.0 | 1.86 | 1.3 - 2.6 | 0.32 | 0.2 - 0.6 |



**K**

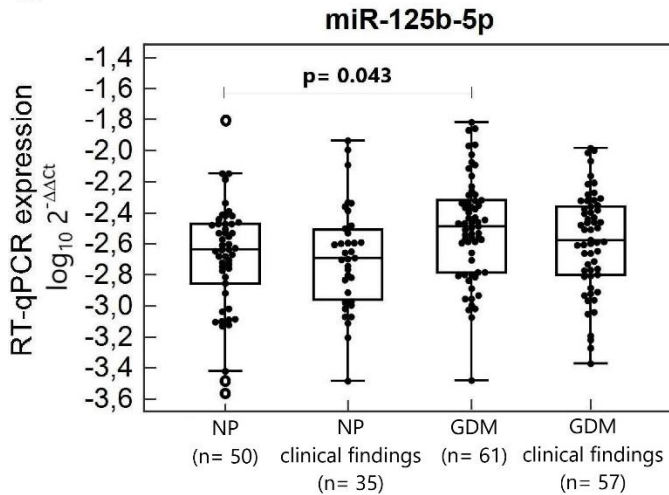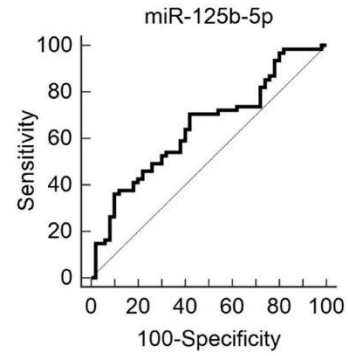

|                                 |                |
|---------------------------------|----------------|
| Area under the ROC curve (AUC)  | 0.649          |
| Standard Error                  | 0.0524         |
| 95% Confidence interval         | 0.552 to 0.737 |
| Significance level P (Area=0.5) | 0.0045         |

| Estimated sensitivity at fixed specificity |             |                |              |
|--------------------------------------------|-------------|----------------|--------------|
| Specificity                                | Sensitivity | 95% CI         | Criterion    |
| 90.00                                      | 36.07       | 14.75 to 54.10 | >0.004081449 |

| Criterion    | Sensitivity | 95% CI      | Specificity | 95% CI      | +LR  | 95% CI    | -LR  | 95% CI    |
|--------------|-------------|-------------|-------------|-------------|------|-----------|------|-----------|
| >0.002504764 | 70.49       | 57.4 - 81.5 | 58.00       | 43.2 - 71.8 | 1.68 | 1.2 - 2.4 | 0.51 | 0.3 - 0.8 |

**L**

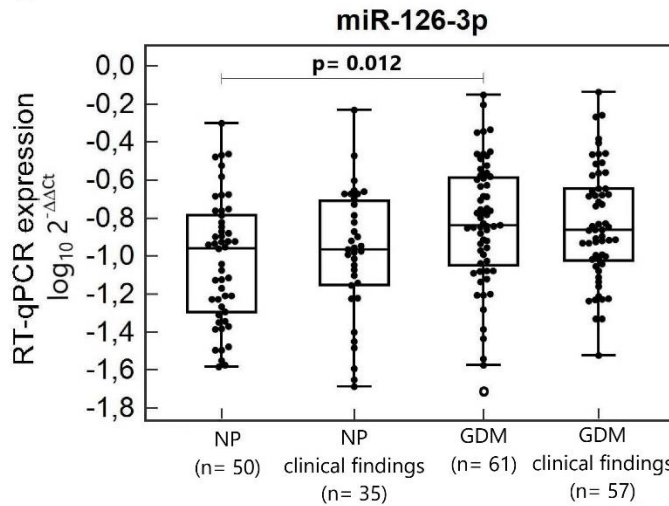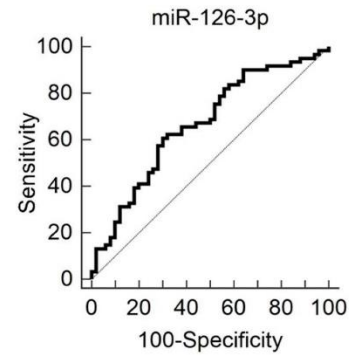

|                                 |                |
|---------------------------------|----------------|
| Area under the ROC curve (AUC)  | 0.667          |
| Standard Error                  | 0.0520         |
| 95% Confidence interval         | 0.571 to 0.753 |
| Significance level P (Area=0.5) | 0.0014         |

| Estimated sensitivity at fixed specificity |             |               |              |
|--------------------------------------------|-------------|---------------|--------------|
| Specificity                                | Sensitivity | 95% CI        | Criterion    |
| 90.00                                      | 24.59       | 8.20 to 44.26 | >0.260164721 |

| Criterion    | Sensitivity | 95% CI      | Specificity | 95% CI      | +LR  | 95% CI    | -LR  | 95% CI    |
|--------------|-------------|-------------|-------------|-------------|------|-----------|------|-----------|
| >0.133541075 | 60.66       | 47.3 - 72.9 | 70.00       | 55.4 - 82.1 | 2.02 | 1.3 - 3.2 | 0.56 | 0.4 - 0.8 |



**M**

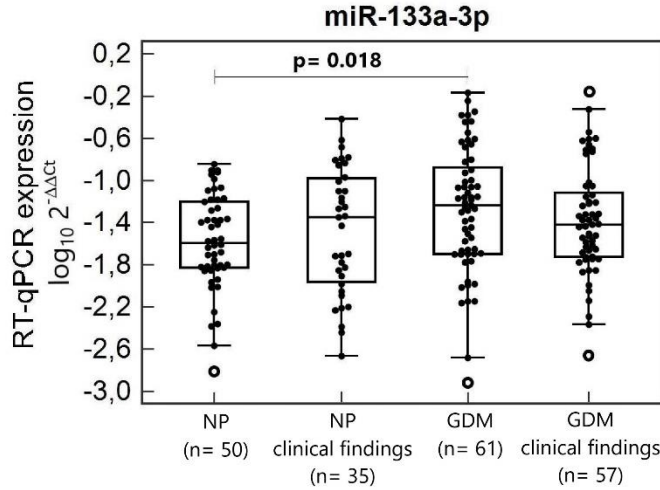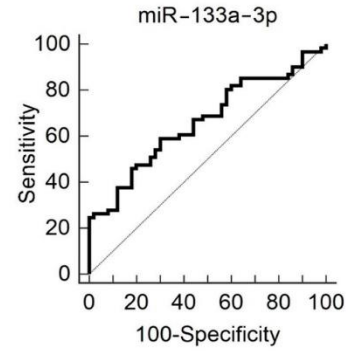

|                                 |                |
|---------------------------------|----------------|
| Area under the ROC curve (AUC)  | 0.663          |
| Standard Error                  | 0.0513         |
| 95% Confidence interval         | 0.567 to 0.750 |
| Significance level P (Area=0.5) | 0.0015         |

| Estimated sensitivity at fixed specificity |             |                |              |
|--------------------------------------------|-------------|----------------|--------------|
| Specificity                                | Sensitivity | 95% CI         | Criterion    |
| 90.00                                      | 27.87       | 13.11 to 42.62 | >0.102754776 |

| Criterion    | Sensitivity | 95% CI      | Specificity | 95% CI      | +LR  | 95% CI    | -LR  | 95% CI    |
|--------------|-------------|-------------|-------------|-------------|------|-----------|------|-----------|
| >0.042944859 | 59.02       | 45.7 - 71.4 | 70.00       | 55.4 - 82.1 | 1.97 | 1.2 - 3.2 | 0.59 | 0.4 - 0.8 |

**N**

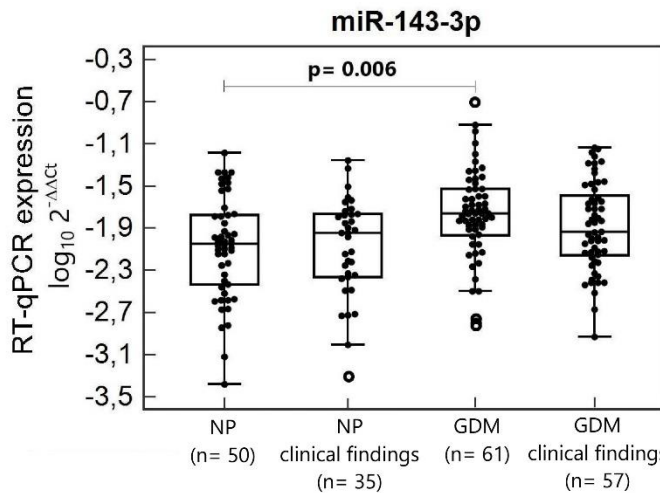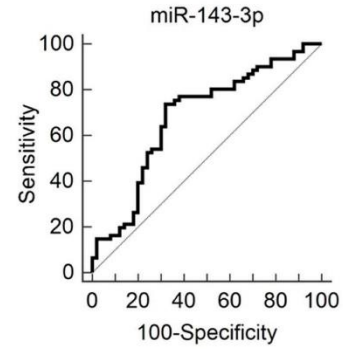

|                                 |                |
|---------------------------------|----------------|
| Area under the ROC curve (AUC)  | 0.681          |
| Standard Error                  | 0.0524         |
| 95% Confidence interval         | 0.586 to 0.766 |
| Significance level P (Area=0.5) | 0.0006         |

| Estimated sensitivity at fixed specificity |             |               |              |
|--------------------------------------------|-------------|---------------|--------------|
| Specificity                                | Sensitivity | 95% CI        | Criterion    |
| 90.00                                      | 16.39       | 6.56 to 31.15 | >0.036813583 |

| Criterion    | Sensitivity | 95% CI      | Specificity | 95% CI      | +LR  | 95% CI    | -LR  | 95% CI    |
|--------------|-------------|-------------|-------------|-------------|------|-----------|------|-----------|
| >0.011820045 | 73.77       | 60.9 - 84.2 | 68.00       | 53.3 - 80.5 | 2.31 | 1.5 - 3.5 | 0.39 | 0.2 - 0.6 |

**O**

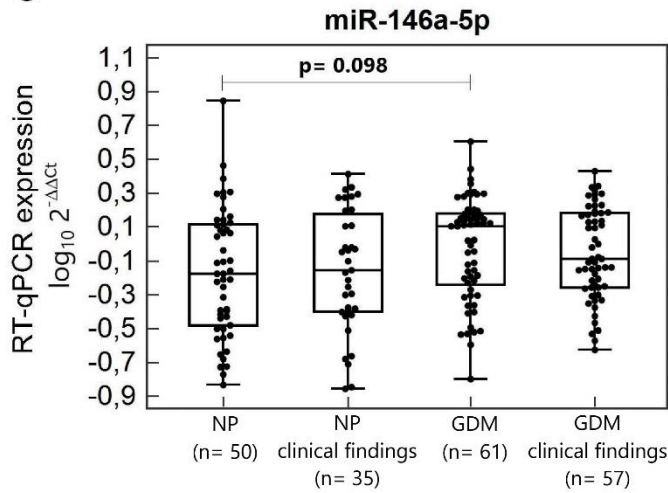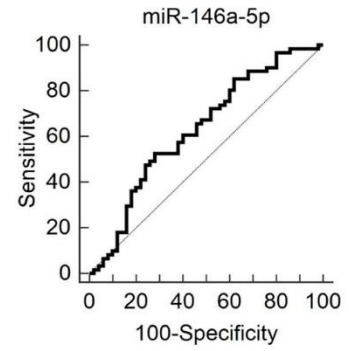

|                                 |                |
|---------------------------------|----------------|
| Area under the ROC curve (AUC)  | 0.630          |
| Standard Error                  | 0.0542         |
| 95% Confidence interval         | 0.534 to 0.720 |
| Significance level P (Area=0.5) | 0.0161         |

| Estimated sensitivity at fixed specificity |             |               |              |
|--------------------------------------------|-------------|---------------|--------------|
| Specificity                                | Sensitivity | 95% CI        | Criterion    |
| 90.00                                      | 9.84        | 1.64 to 36.07 | >1.978207675 |

| Criterion    | Sensitivity | 95% CI      | Specificity | 95% CI      | +LR  | 95% CI    | -LR  | 95% CI    |
|--------------|-------------|-------------|-------------|-------------|------|-----------|------|-----------|
| >1.208562374 | 52.46       | 39.3 - 65.4 | 72.00       | 57.5 - 83.8 | 1.87 | 1.1 - 3.1 | 0.66 | 0.5 - 0.9 |

**P**

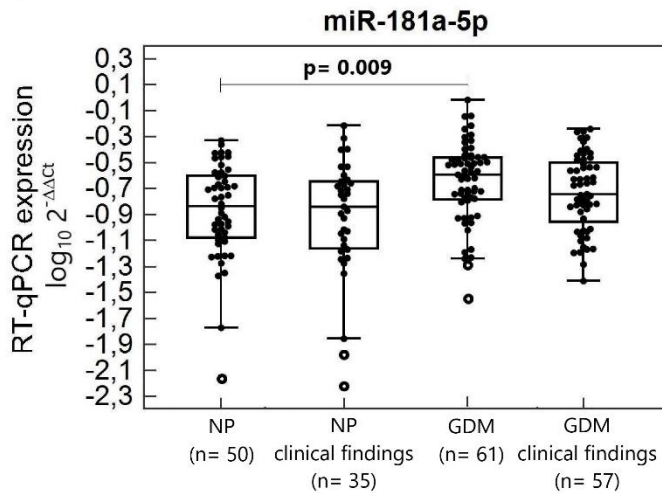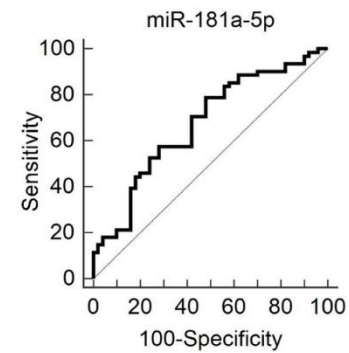

|                                 |                |
|---------------------------------|----------------|
| Area under the ROC curve (AUC)  | 0.674          |
| Standard Error                  | 0.0517         |
| 95% Confidence interval         | 0.578 to 0.760 |
| Significance level P (Area=0.5) | 0.0008         |

| Estimated sensitivity at fixed specificity |             |                |              |
|--------------------------------------------|-------------|----------------|--------------|
| Specificity                                | Sensitivity | 95% CI         | Criterion    |
| 90.00                                      | 21.31       | 11.48 to 50.82 | >0.354784047 |

| Criterion    | Sensitivity | 95% CI      | Specificity | 95% CI      | +LR  | 95% CI    | -LR  | 95% CI    |
|--------------|-------------|-------------|-------------|-------------|------|-----------|------|-----------|
| >0.153329532 | 78.69       | 66.3 - 88.1 | 52.00       | 37.4 - 66.3 | 1.64 | 1.2 - 2.3 | 0.41 | 0.2 - 0.7 |

**Q**

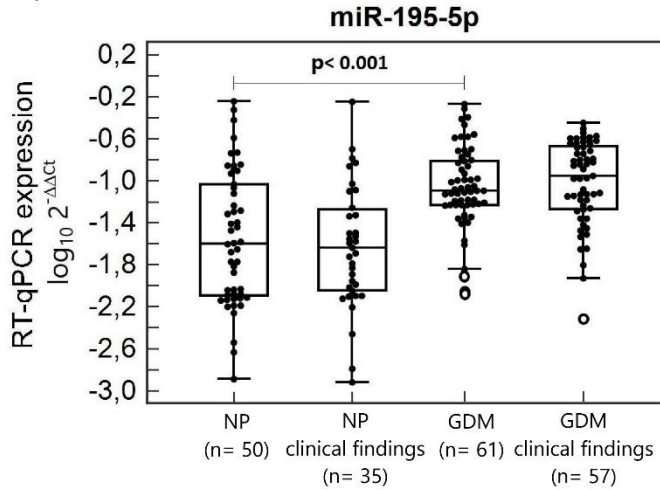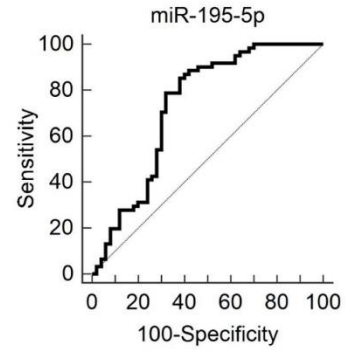

|                                 |                       |
|---------------------------------|-----------------------|
| Area under the ROC curve (AUC)  | 0.730                 |
| Standard Error                  | 0.0516                |
| 95% Confidence interval         | 0.637 to 0.809        |
| Significance level P (Area=0.5) | <math>< 0.0001</math> |

| Estimated sensitivity at fixed specificity |             |               |              |
|--------------------------------------------|-------------|---------------|--------------|
| Specificity                                | Sensitivity | 95% CI        | Criterion    |
| 90.00                                      | 19.67       | 4.92 to 36.07 | >0.183009328 |

| Criterion    | Sensitivity | 95% CI      | Specificity | 95% CI      | +LR  | 95% CI    | -LR  | 95% CI    |
|--------------|-------------|-------------|-------------|-------------|------|-----------|------|-----------|
| >0.039818758 | 85.25       | 73.8 - 93.0 | 62.00       | 47.2 - 75.3 | 2.24 | 1.6 - 3.2 | 0.24 | 0.1 - 0.5 |

**R**

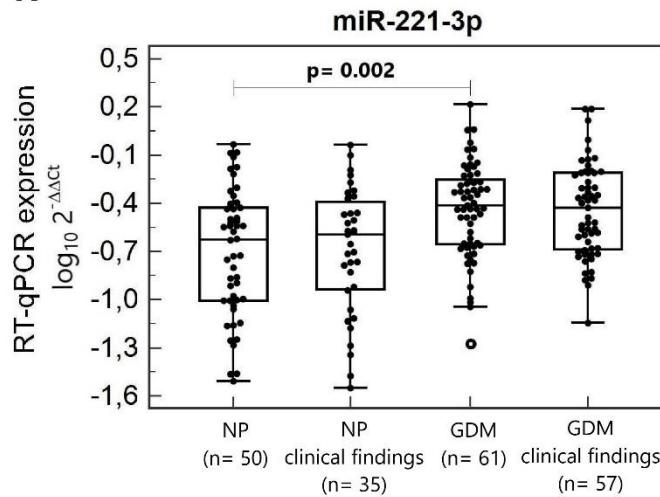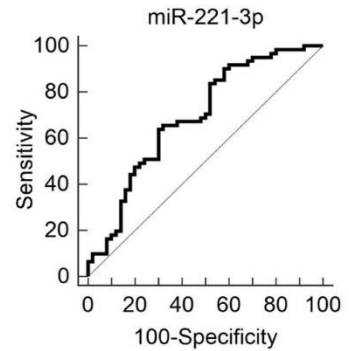

|                                 |                |
|---------------------------------|----------------|
| Area under the ROC curve (AUC)  | 0.692          |
| Standard Error                  | 0.0513         |
| 95% Confidence interval         | 0.598 to 0.777 |
| Significance level P (Area=0.5) | 0.0002         |

| Estimated sensitivity at fixed specificity |             |               |              |
|--------------------------------------------|-------------|---------------|--------------|
| Specificity                                | Sensitivity | 95% CI        | Criterion    |
| 90.00                                      | 18.03       | 4.92 to 47.54 | >0.650022942 |

| Criterion    | Sensitivity | 95% CI      | Specificity | 95% CI      | +LR  | 95% CI    | -LR  | 95% CI    |
|--------------|-------------|-------------|-------------|-------------|------|-----------|------|-----------|
| >0.322303976 | 63.93       | 50.6 - 75.8 | 70.00       | 55.4 - 82.1 | 2.13 | 1.3 - 3.4 | 0.52 | 0.4 - 0.8 |

**S**

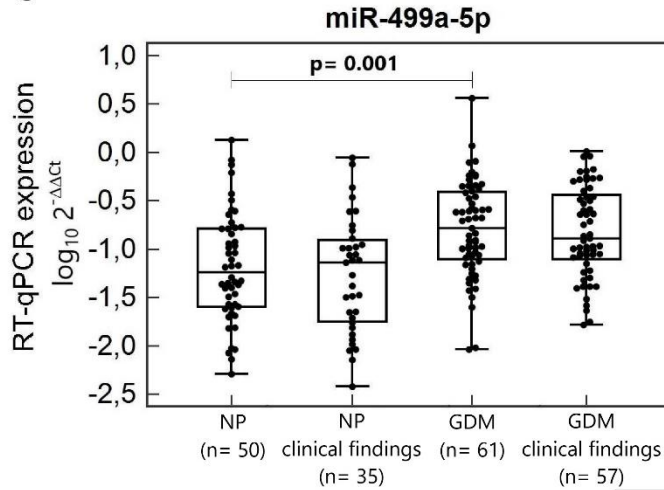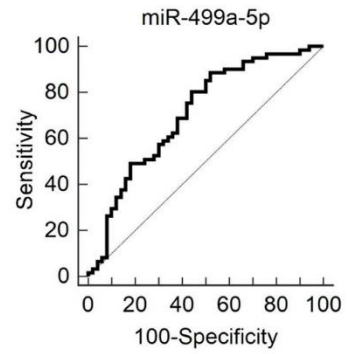

|                                 |                |
|---------------------------------|----------------|
| Area under the ROC curve (AUC)  | 0.709          |
| Standard Error                  | 0.0505         |
| 95% Confidence interval         | 0.615 to 0.791 |
| Significance level P (Area=0.5) | <0.0001        |

| Estimated sensitivity at fixed specificity |             |               |             |
|--------------------------------------------|-------------|---------------|-------------|
| Specificity                                | Sensitivity | 95% CI        | Criterion   |
| 90.00                                      | 29.51       | 3.28 to 50.82 | >0.32173153 |

| Criterion   | Sensitivity | 95% CI      | Specificity | 95% CI      | +LR  | 95% CI    | -LR  | 95% CI    |
|-------------|-------------|-------------|-------------|-------------|------|-----------|------|-----------|
| >0.04701734 | 88.52       | 77.8 - 95.3 | 48.00       | 33.7 - 62.6 | 1.70 | 1.3 - 2.3 | 0.24 | 0.1 - 0.5 |

**T**

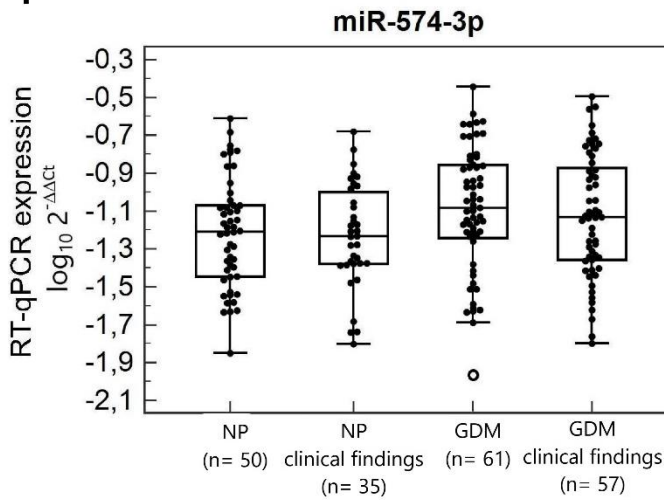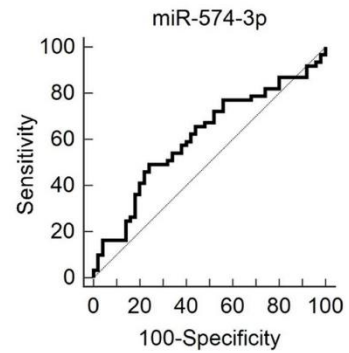

|                                 |                |
|---------------------------------|----------------|
| Area under the ROC curve (AUC)  | 0.610          |
| Standard Error                  | 0.0541         |
| 95% Confidence interval         | 0.513 to 0.702 |
| Significance level P (Area=0.5) | 0.0413         |

| Estimated sensitivity at fixed specificity |             |               |            |
|--------------------------------------------|-------------|---------------|------------|
| Specificity                                | Sensitivity | 95% CI        | Criterion  |
| 90.00                                      | 16.39       | 6.56 to 36.07 | >0.1622597 |

| Criterion    | Sensitivity | 95% CI      | Specificity | 95% CI      | +LR  | 95% CI    | -LR  | 95% CI    |
|--------------|-------------|-------------|-------------|-------------|------|-----------|------|-----------|
| >0.085096123 | 49.18       | 36.1 - 62.3 | 76.00       | 61.8 - 86.9 | 2.05 | 1.2 - 3.6 | 0.67 | 0.5 - 0.9 |

**U**

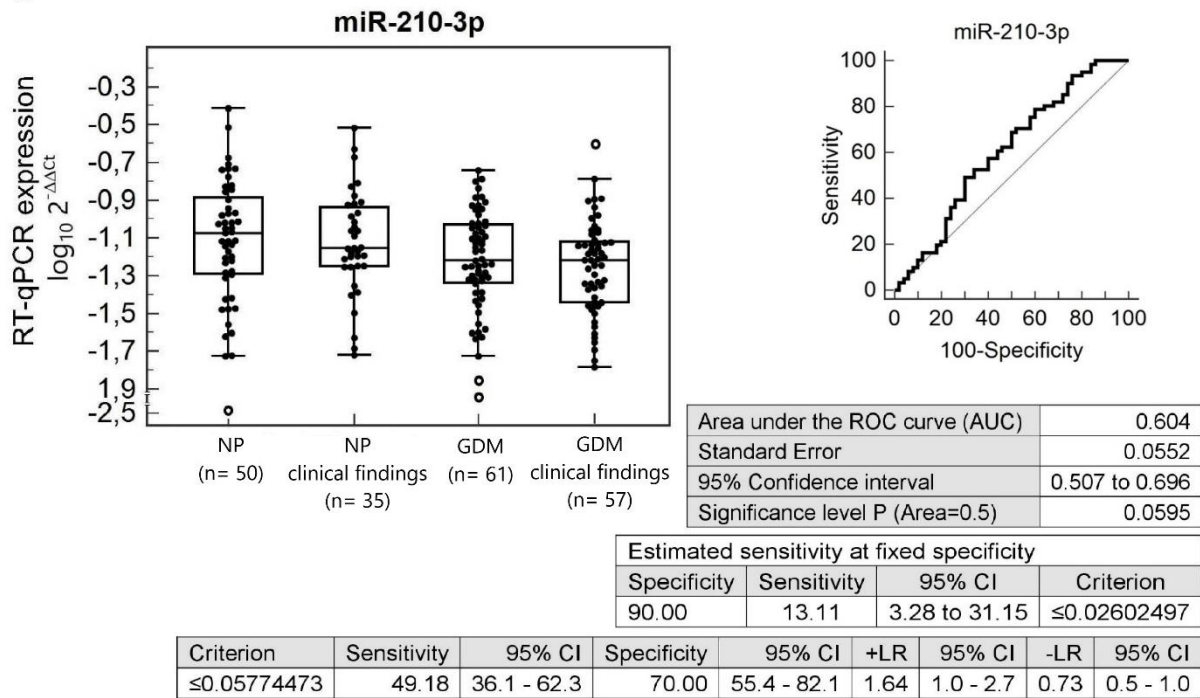

**Supplementary Figure S4:** Aberrant microRNA expression profile in children descending from GDM complicated pregnancies with normal clinical findings. **(A–T)** Up-regulation of miR-16-5p, miR-17-5p, miR-20a-5p, miR-20b-5p, miR-21-5p, miR-23a-3p, miR-26a-5p, miR-29a-3p, miR-100-5p, miR-103a-3p, miR-125b-5p, miR-126-3p, miR-133a-3p, miR-143-3p, miR-146a-5p, miR-181a-5p, miR-195-5p, miR-221-3p, miR-499a-5p, and miR-574-3p and **(U)** down-regulation of miR-210-3p was observed in children descending from GDM complicated pregnancies with normal clinical findings, when the comparison to the controls with normal clinical findings was performed. NP, normal pregnancies; GDM, gestational diabetes mellitus.



**A**

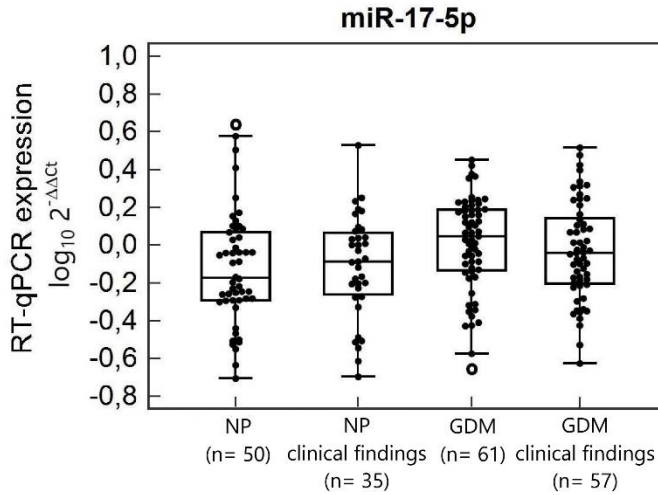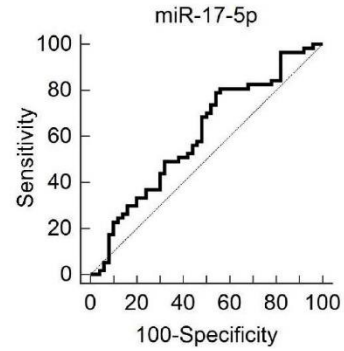

|                                 |                |
|---------------------------------|----------------|
| Area under the ROC curve (AUC)  | 0.606          |
| Standard Error                  | 0.0555         |
| 95% Confidence interval         | 0.507 to 0.699 |
| Significance level P (Area=0.5) | 0.0561         |

| Estimated sensitivity at fixed specificity |             |               |              |
|--------------------------------------------|-------------|---------------|--------------|
| Specificity                                | Sensitivity | 95% CI        | Criterion    |
| 90.00                                      | 22.81       | 1.75 to 40.35 | >1.476408484 |

| Criterion    | Sensitivity | 95% CI      | Specificity | 95% CI      | +LR  | 95% CI    | -LR  | 95% CI    |
|--------------|-------------|-------------|-------------|-------------|------|-----------|------|-----------|
| >0.599240692 | 78.95       | 66.1 - 88.6 | 46.00       | 31.8 - 60.7 | 1.46 | 1.1 - 2.0 | 0.46 | 0.3 - 0.8 |

**B**

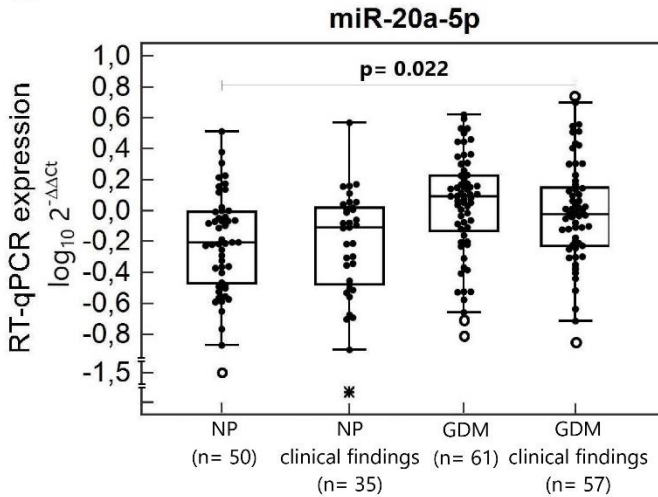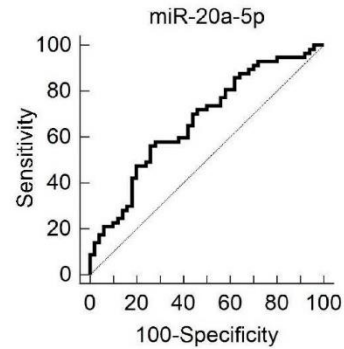

|                                 |                |
|---------------------------------|----------------|
| Area under the ROC curve (AUC)  | 0.671          |
| Standard Error                  | 0.0523         |
| 95% Confidence interval         | 0.573 to 0.759 |
| Significance level P (Area=0.5) | 0.0011         |

| Estimated sensitivity at fixed specificity |             |                |           |
|--------------------------------------------|-------------|----------------|-----------|
| Specificity                                | Sensitivity | 95% CI         | Criterion |
| 90.00                                      | 22.81       | 10.53 to 43.86 | >1.481534 |

| Criterion | Sensitivity | 95% CI      | Specificity | 95% CI      | +LR  | 95% CI    | -LR  | 95% CI    |
|-----------|-------------|-------------|-------------|-------------|------|-----------|------|-----------|
| >0.901802 | 56.14       | 42.4 - 69.3 | 74.00       | 59.7 - 85.4 | 2.16 | 1.3 - 3.6 | 0.59 | 0.4 - 0.8 |

**C**

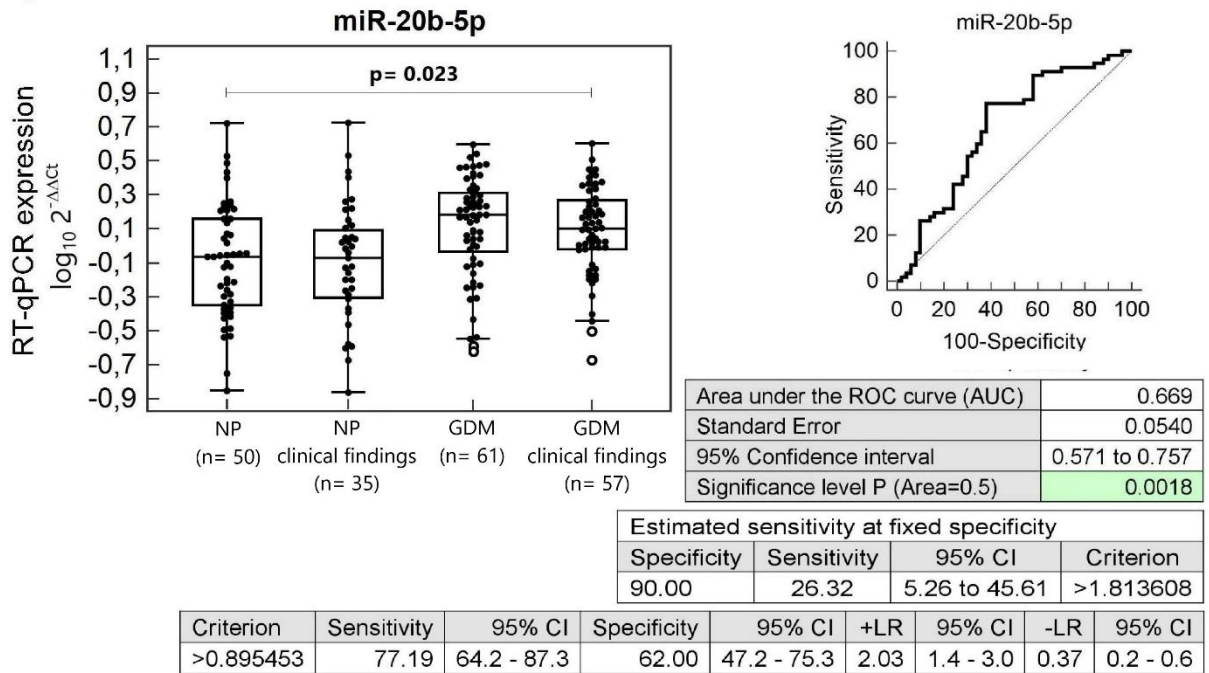

**D**

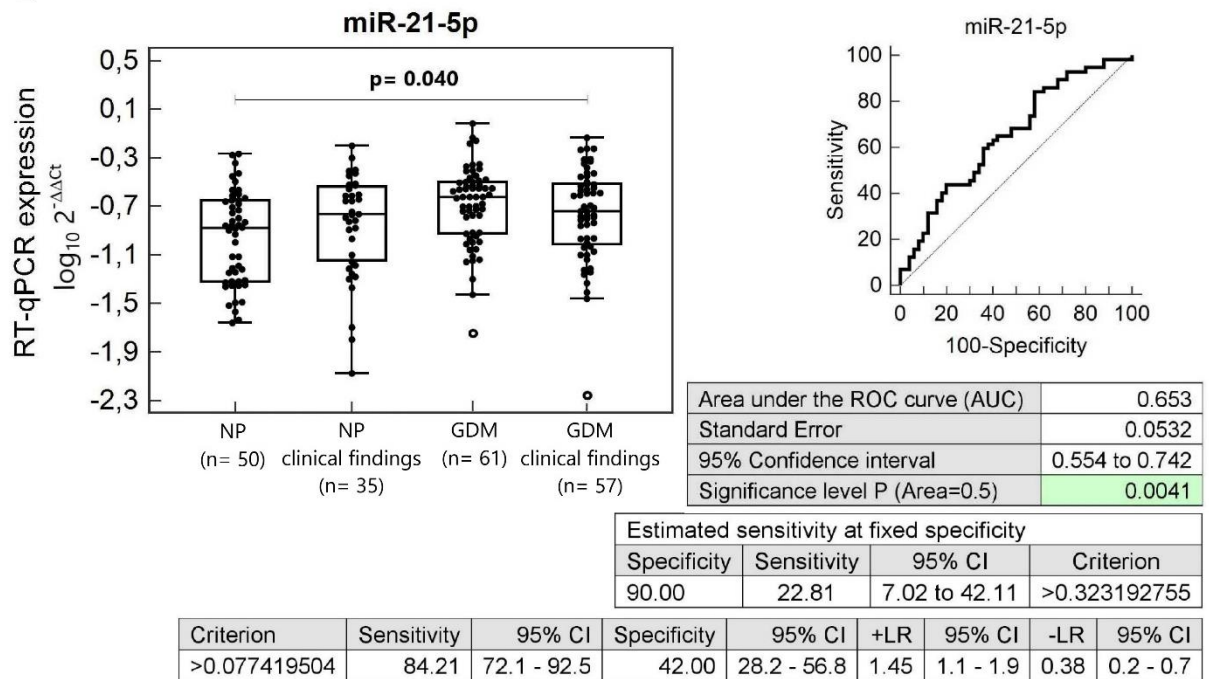

**E**

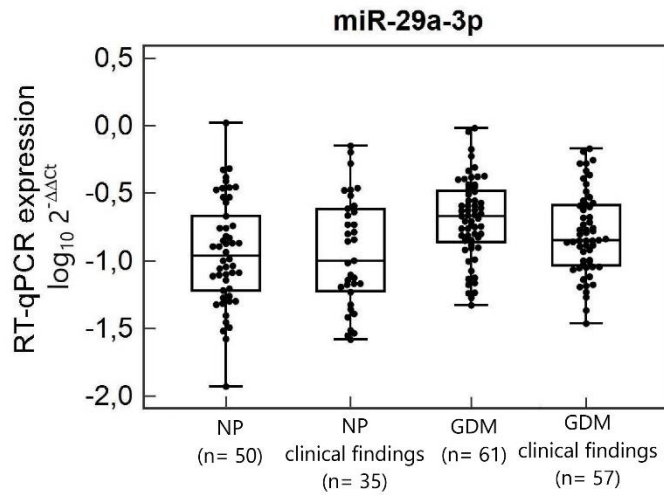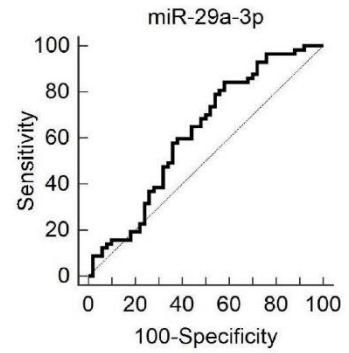

|                                 |                |
|---------------------------------|----------------|
| Area under the ROC curve (AUC)  | 0.621          |
| Standard Error                  | 0.0557         |
| 95% Confidence interval         | 0.522 to 0.713 |
| Significance level P (Area=0.5) | 0.0297         |

| Estimated sensitivity at fixed specificity |             |               |              |
|--------------------------------------------|-------------|---------------|--------------|
| Specificity                                | Sensitivity | 95% CI        | Criterion    |
| 90.00                                      | 15.79       | 7.02 to 33.33 | >0.351278964 |

| Criterion    | Sensitivity | 95% CI      | Specificity | 95% CI      | +LR  | 95% CI    | -LR  | 95% CI    |
|--------------|-------------|-------------|-------------|-------------|------|-----------|------|-----------|
| >0.086833444 | 84.21       | 72.1 - 92.5 | 42.00       | 28.2 - 56.8 | 1.45 | 1.1 - 1.9 | 0.38 | 0.2 - 0.7 |

**F**

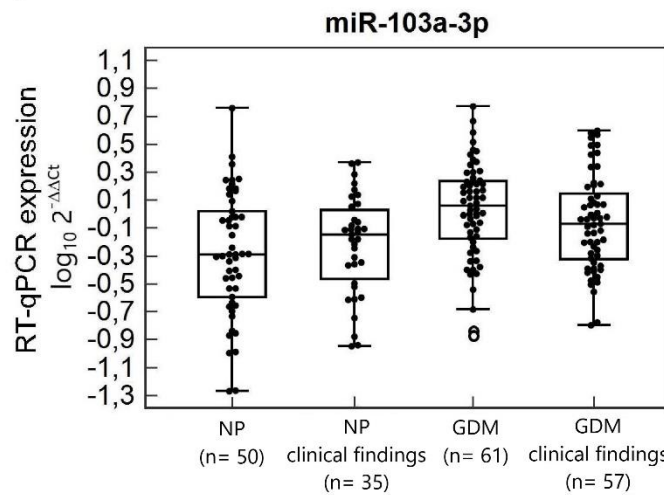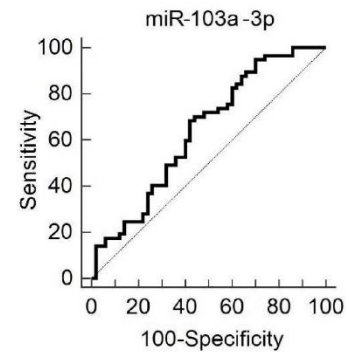

|                                 |                |
|---------------------------------|----------------|
| Area under the ROC curve (AUC)  | 0.639          |
| Standard Error                  | 0.0544         |
| 95% Confidence interval         | 0.541 to 0.730 |
| Significance level P (Area=0.5) | 0.0105         |

| Estimated sensitivity at fixed specificity |             |               |              |
|--------------------------------------------|-------------|---------------|--------------|
| Specificity                                | Sensitivity | 95% CI        | Criterion    |
| 90.00                                      | 17.54       | 8.77 to 29.82 | >1.768871485 |

| Criterion    | Sensitivity | 95% CI      | Specificity | 95% CI      | +LR  | 95% CI    | -LR  | 95% CI    |
|--------------|-------------|-------------|-------------|-------------|------|-----------|------|-----------|
| >0.580303016 | 68.42       | 54.8 - 80.1 | 58.00       | 43.2 - 71.8 | 1.63 | 1.1 - 2.4 | 0.54 | 0.3 - 0.9 |

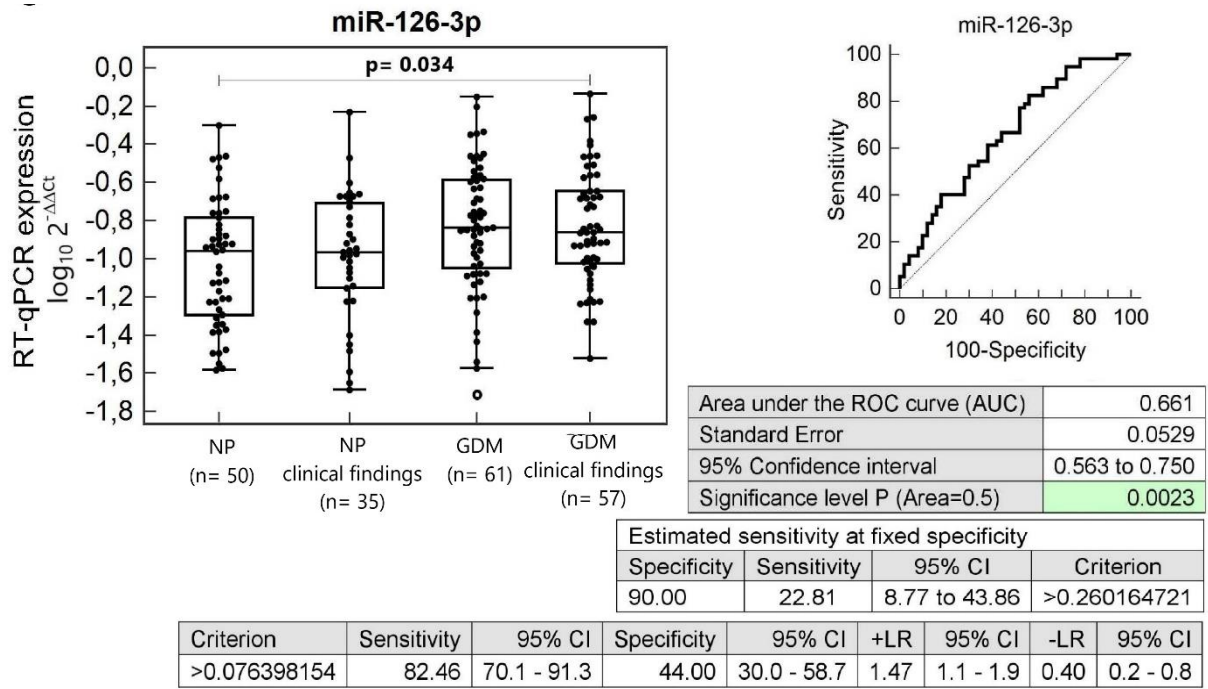

**H**

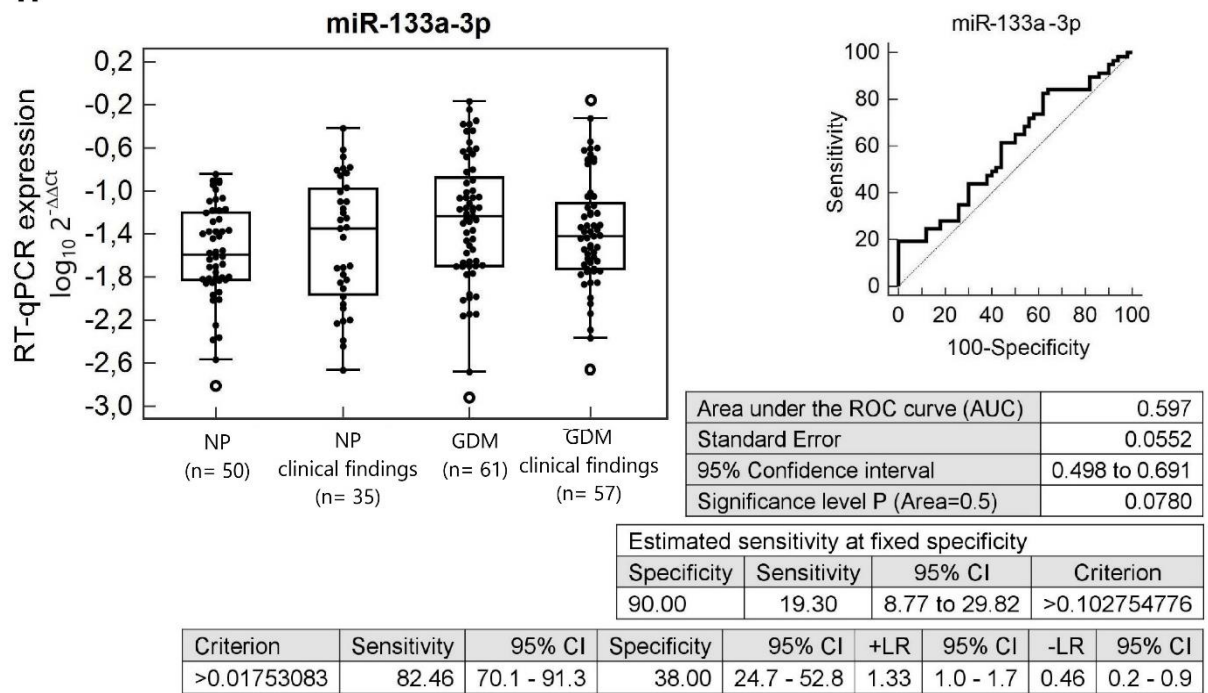



I

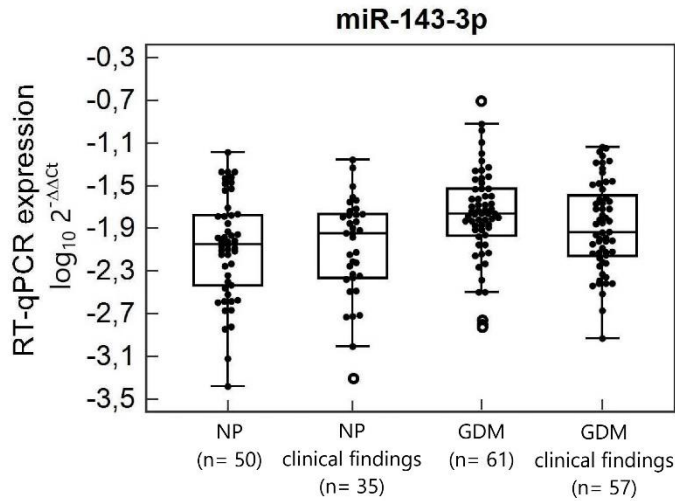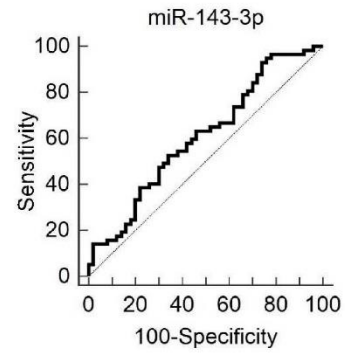

|                                 |                |
|---------------------------------|----------------|
| Area under the ROC curve (AUC)  | 0.608          |
| Standard Error                  | 0.0550         |
| 95% Confidence interval         | 0.509 to 0.701 |
| Significance level P (Area=0.5) | 0.0493         |

| Estimated sensitivity at fixed specificity |             |               |              |
|--------------------------------------------|-------------|---------------|--------------|
| Specificity                                | Sensitivity | 95% CI        | Criterion    |
| 90.00                                      | 15.79       | 7.02 to 31.35 | >0.036813583 |

| Criterion    | Sensitivity | 95% CI      | Specificity | 95% CI      | +LR  | 95% CI    | -LR  | 95% CI     |
|--------------|-------------|-------------|-------------|-------------|------|-----------|------|------------|
| >0.003670539 | 92.98       | 83.0 - 98.1 | 26.00       | 14.6 - 40.3 | 1.26 | 1.1 - 1.5 | 0.27 | 0.09 - 0.8 |

J

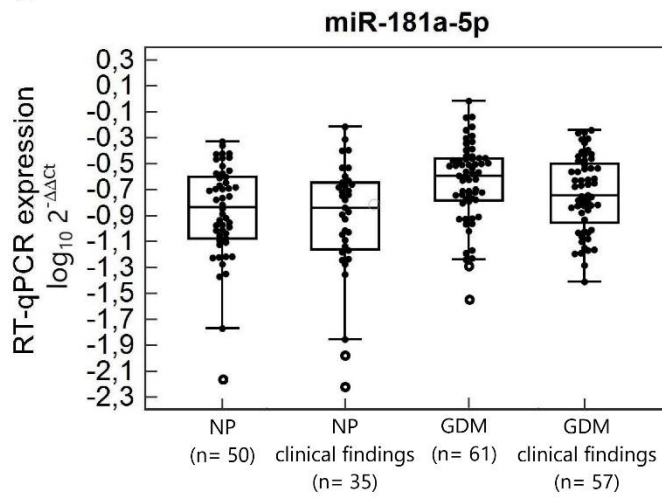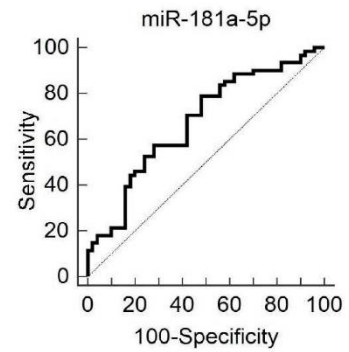

|                                 |                |
|---------------------------------|----------------|
| Area under the ROC curve (AUC)  | 0.603          |
| Standard Error                  | 0.0550         |
| 95% Confidence interval         | 0.504 to 0.696 |
| Significance level P (Area=0.5) | 0.0608         |

| Estimated sensitivity at fixed specificity |             |               |              |
|--------------------------------------------|-------------|---------------|--------------|
| Specificity                                | Sensitivity | 95% CI        | Criterion    |
| 90.00                                      | 19.30       | 8.77 to 37.02 | >0.354784047 |

| Criterion    | Sensitivity | 95% CI      | Specificity | 95% CI      | +LR  | 95% CI    | -LR  | 95% CI    |
|--------------|-------------|-------------|-------------|-------------|------|-----------|------|-----------|
| >0.131424946 | 73.68       | 60.3 - 84.5 | 48.00       | 33.7 - 62.6 | 1.42 | 1.0 - 1.9 | 0.55 | 0.3 - 0.9 |



**K**

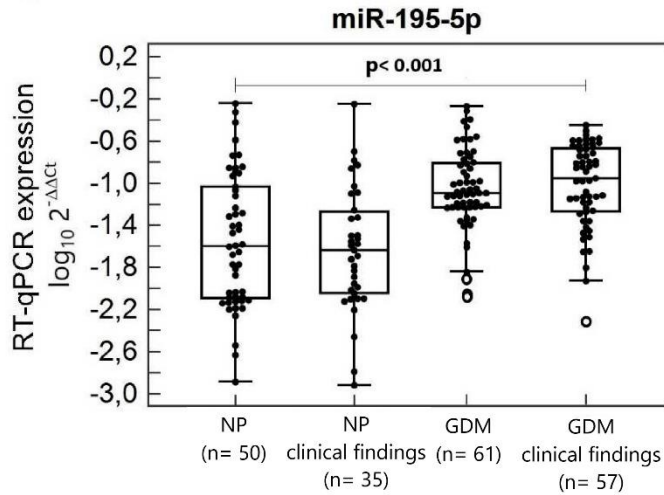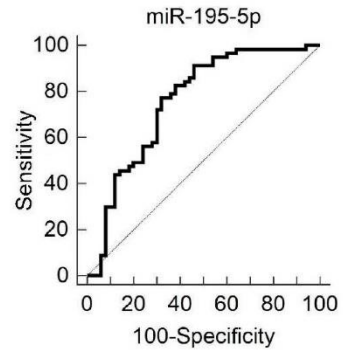

|                                 |                       |
|---------------------------------|-----------------------|
| Area under the ROC curve (AUC)  | 0.755                 |
| Standard Error                  | 0.0491                |
| 95% Confidence interval         | 0.662 to 0.833        |
| Significance level P (Area=0.5) | <math>< 0.0001</math> |

| Estimated sensitivity at fixed specificity |             |               |              |
|--------------------------------------------|-------------|---------------|--------------|
| Specificity                                | Sensitivity | 95% CI        | Criterion    |
| 90.00                                      | 29.82       | 0.00 to 50.88 | >0.183009328 |

| Criterion    | Sensitivity | 95% CI      | Specificity | 95% CI      | +LR  | 95% CI    | -LR  | 95% CI     |
|--------------|-------------|-------------|-------------|-------------|------|-----------|------|------------|
| >0.026151807 | 91.23       | 80.7 - 97.1 | 54.00       | 39.3 - 68.2 | 1.98 | 1.5 - 2.7 | 0.16 | 0.07 - 0.4 |

**L**

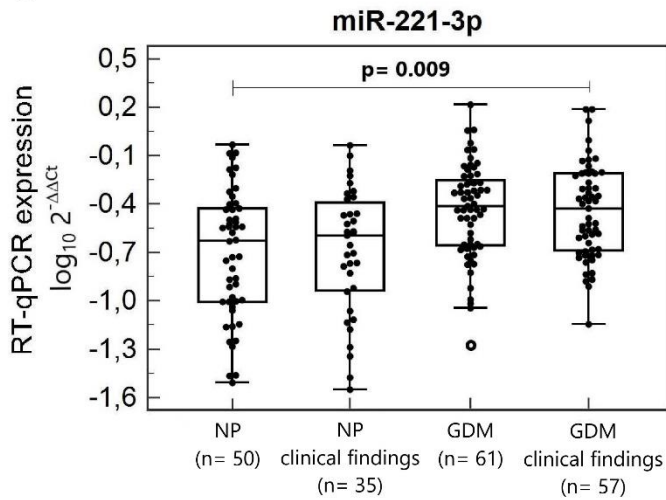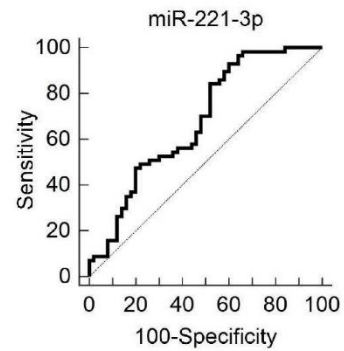

|                                 |                |
|---------------------------------|----------------|
| Area under the ROC curve (AUC)  | 0.679          |
| Standard Error                  | 0.0528         |
| 95% Confidence interval         | 0.581 to 0.766 |
| Significance level P (Area=0.5) | 0.0007         |

| Estimated sensitivity at fixed specificity |             |               |              |
|--------------------------------------------|-------------|---------------|--------------|
| Specificity                                | Sensitivity | 95% CI        | Criterion    |
| 90.00                                      | 15.79       | 3.51 to 40.35 | >0.650022942 |

| Criterion    | Sensitivity | 95% CI      | Specificity | 95% CI      | +LR  | 95% CI    | -LR  | 95% CI     |
|--------------|-------------|-------------|-------------|-------------|------|-----------|------|------------|
| >0.137483943 | 92.98       | 83.0 - 98.1 | 40.00       | 26.4 - 54.8 | 1.55 | 1.2 - 2.0 | 0.18 | 0.06 - 0.5 |

**M**

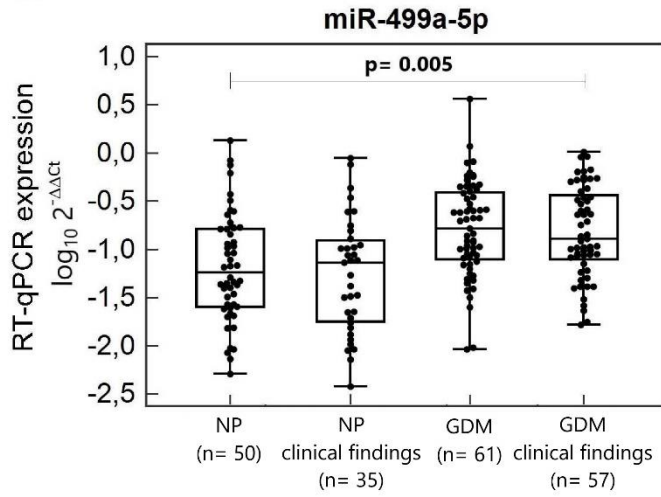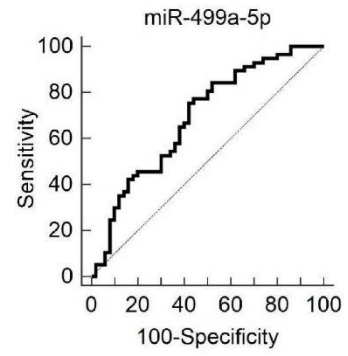

|                                 |                |
|---------------------------------|----------------|
| Area under the ROC curve (AUC)  | 0.688          |
| Standard Error                  | 0.0520         |
| 95% Confidence interval         | 0.591 to 0.774 |
| Significance level P (Area=0.5) | 0.0003         |

| Estimated sensitivity at fixed specificity |             |               |             |
|--------------------------------------------|-------------|---------------|-------------|
| Specificity                                | Sensitivity | 95% CI        | Criterion   |
| 90.00                                      | 29.82       | 3.51 to 49.12 | >0.32173153 |

| Criterion    | Sensitivity | 95% CI      | Specificity | 95% CI      | +LR  | 95% CI    | -LR  | 95% CI    |
|--------------|-------------|-------------|-------------|-------------|------|-----------|------|-----------|
| >0.077646272 | 75.44       | 62.2 - 85.9 | 58.00       | 43.2 - 71.8 | 1.80 | 1.3 - 2.6 | 0.42 | 0.3 - 0.7 |

**N**

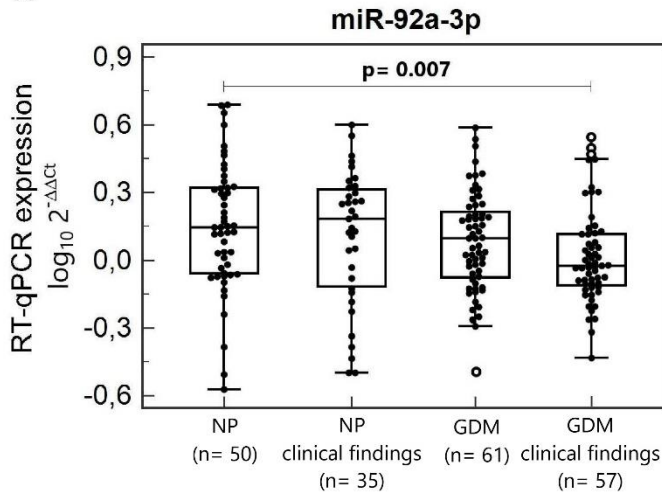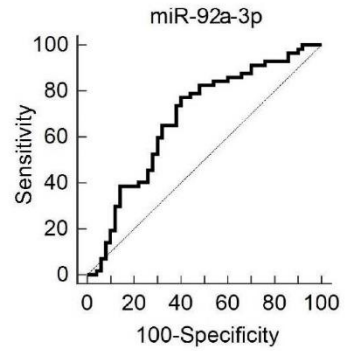

|                                 |                |
|---------------------------------|----------------|
| Area under the ROC curve (AUC)  | 0.682          |
| Standard Error                  | 0.0532         |
| 95% Confidence interval         | 0.585 to 0.768 |
| Significance level P (Area=0.5) | 0.0006         |

| Estimated sensitivity at fixed specificity |             |               |              |
|--------------------------------------------|-------------|---------------|--------------|
| Specificity                                | Sensitivity | 95% CI        | Criterion    |
| 90.00                                      | 19.30       | 0.00 to 45.61 | ≤0.720377192 |

| Criterion    | Sensitivity | 95% CI      | Specificity | 95% CI      | +LR  | 95% CI    | -LR  | 95% CI    |
|--------------|-------------|-------------|-------------|-------------|------|-----------|------|-----------|
| ≤1.301234196 | 77.19       | 64.2 - 87.3 | 60.00       | 45.2 - 73.6 | 1.93 | 1.3 - 2.8 | 0.38 | 0.2 - 0.6 |

**O**

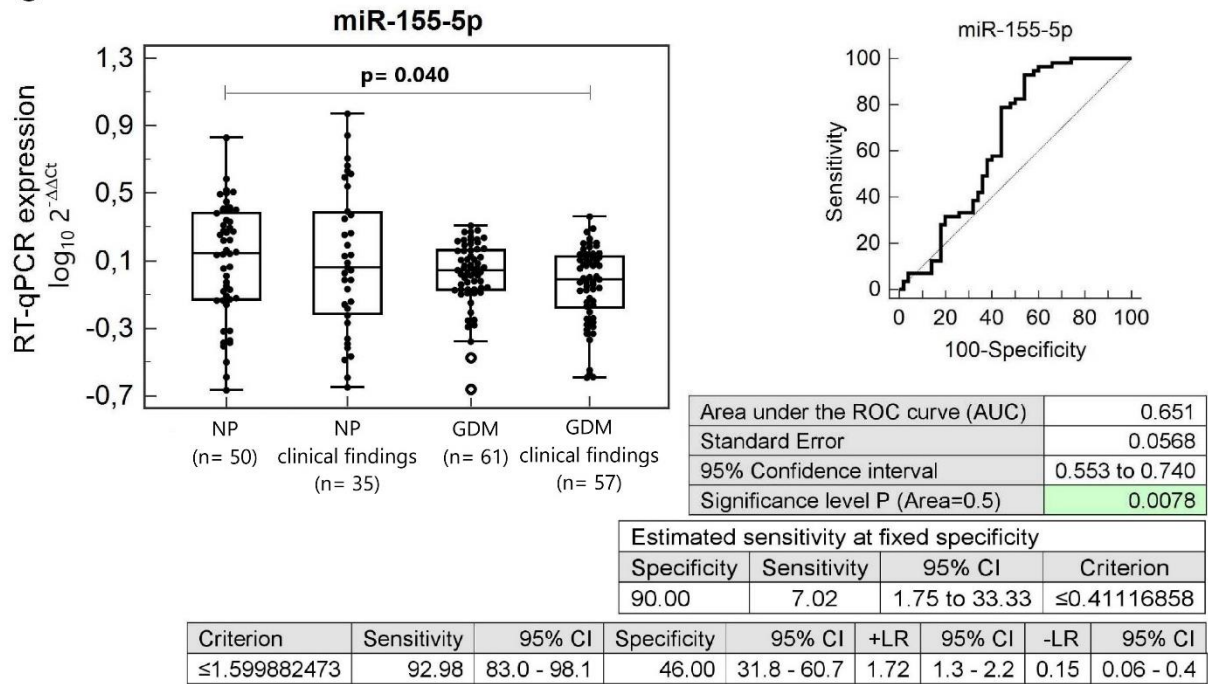

**P**

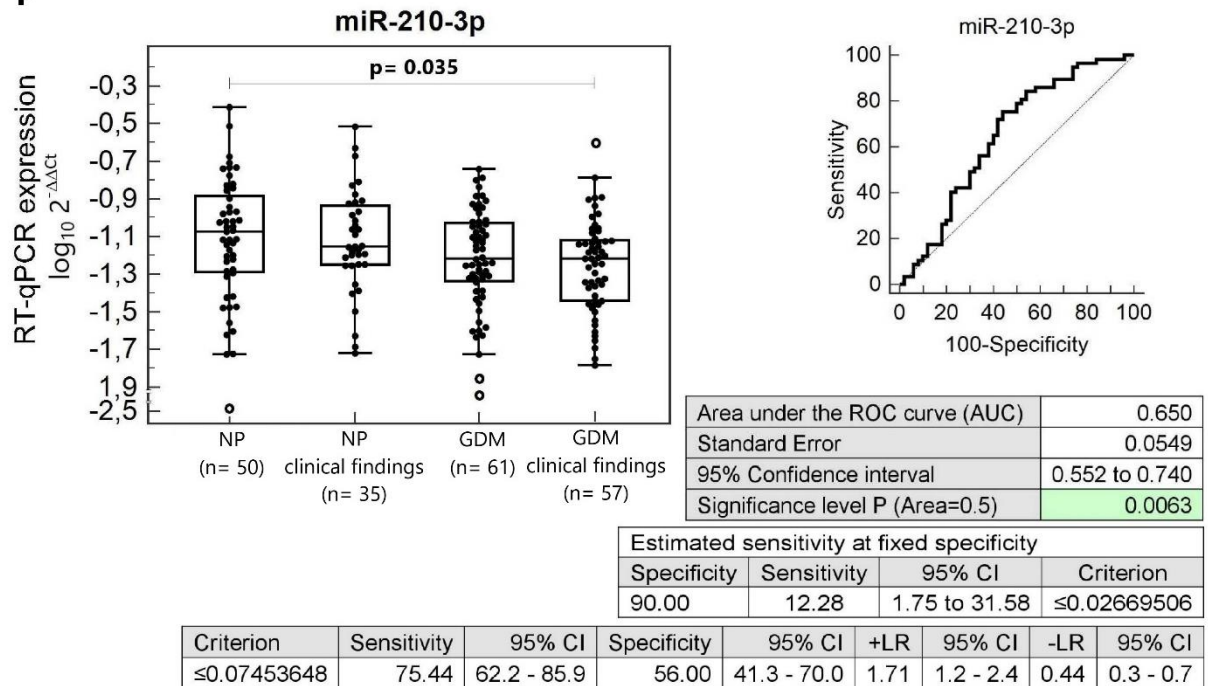

**Supplementary Figure S5:** Aberrant microRNA expression profile in children descending from GDM complicated pregnancies with abnormal clinical findings. (A–M) Up-regulation of miR-17-5p, miR-20a-5p, miR-20b-5p, miR-21-5p, miR-29a-3p, miR-103a-3p, miR-126-3p, miR-133a-3p, miR-143-3p, miR-181a-5p, miR-195-5p, miR-221-3p, and miR-499a-5p and (N–P) down-regulation of miR-92a-3p, miR-155-5p, and miR-210-3p was observed in children descending from GDM complicated pregnancies with abnormal clinical findings, when the comparison to the controls with normal clinical findings was performed. NP, normal pregnancies; GDM, gestational diabetes mellitus.

**Supplementary Table S1:** A list of predicted targets of appropriate microRNAs dysregulated in whole peripheral blood of children descending from GDM complicated pregnancies in relation to obesity using miRWalk2.0 database (putative microRNA binding sites predicted by miRWalk algorithm within mRNA selected regions).

| microRNA    | Predicted targets - OBESITY                                                                                                                                                                                                                                                                                        |
|-------------|--------------------------------------------------------------------------------------------------------------------------------------------------------------------------------------------------------------------------------------------------------------------------------------------------------------------|
| miR-1       | ACSM3, BDNF, CCL2, EDN1, FABP2, MCHR1, NR3C1, PTPN1, TTR                                                                                                                                                                                                                                                           |
| miR-16-5p   | ADRBK1, ALOX12, APLN, APOC3, ATXN2, CCDC80, FASN, HNF1A, HTR2A, MAF, RNF216                                                                                                                                                                                                                                        |
| miR-17-5p   | ADIPOR2, ALOX15, ANGPTL4, ANKK1, CTSK, CTSS, FAIM2, FAM71F1, FGFR1, GAD2, GCKR, GFPT1, GIPR, HIF1A, HK1, HTR2A, IAPP, IL10, IRX3, LEP, LPIN1, MCHR2, MMP2, MTHFR, MTMR9, NR1H3, PCK1, PNPLA1, PNPLA2, PNPLA3, PPARA, PPARG, PPARGC1B, RNF216, SELP, SERPINE1, SLC6A4, SPP1, SREBF1, SSTR2, STAT3, TNFRSF1B, TWIST1 |
| miR-20a-5p  | ABCA1, CLOCK, CRT3, ES1, HTR2A, IL8, MAP3K5, MCHR2, MFN2, MMP3, NFE2L2, NOS1AP, NPC1, PCK1, PFKP, PNPLA4, SLC2A4, TRPV1, TTR, UCP3                                                                                                                                                                                 |
| miR-20b-5p  | ADIPOR2, ALOX15, ANGPTL4, ANKK1, CTSK, CTSS, FAIM2, FAM71F1, FGFR1, GAD2, GCKR, GFPT1, GIPR, HIF1A, HK1, HTR2A, IAPP, IL10, IRX3, LEP, LPIN1, MCHR2, MMP2, MTMR9, NR1H3, PCK1, PNPLA1, PNPLA3, PPARA, PPARG, PPARGC1B, RNF216, SELP, SERPINE1, SLC6A4, SPP1, SREBF1, SSTR2, STAT3, TNFRSF1B, TWIST1                |
| miR-21-5p   | GFPT1, LITAF, MSTN, PPARA, TLR4,                                                                                                                                                                                                                                                                                   |
| miR-23a-3p  | ABCA1, ADRBK1, APOA5, CLOCK, CTSK, CTSS, F8, FASN, HSD11B1, IGF1, IL8, IRS2, LITAF, LPIN1, MAP3K5, NPC1, PNPLA1, SAA2, SLC6A14, SYT4, TLR4                                                                                                                                                                         |
| miR-26a-5p  | ADCY3, ADM, CCL13, CCL2, CNR1, CRP, ES1, FAM71F1, HGF, IL6, INHBB, MTPP, NAMPT, PON1, PPARGC1B, SELP, SYT4,                                                                                                                                                                                                        |
| miR-29a-3p  | DGAT1, IGF1, LEP, LPL, SIRT1, SLC6A14, TNFRSF1A                                                                                                                                                                                                                                                                    |
| miR-92a-3p  | ADCY3, ADRB1, CCL13, CIDEA, CST3, DOK5, GHSR, GNB3, NPC1, OPRM1, PCK1, RORA, STEAP4, TWIST1                                                                                                                                                                                                                        |
| miR-100-5p  | PPARGC1B, SLC27A4                                                                                                                                                                                                                                                                                                  |
| miR-103a-3p | ADRB2, ALOX12, APLN, ATXN2, BDNF, CRP, DLK1, FASN, FDFT1, GPER1, HSPA1B, HTR2A, IRS2, ITGAX, KLF7, LIPE, MFN2, MMP3, MTMR9, PHB, TBC1D1, TNMD, UCP2                                                                                                                                                                |
| miR-125b-5p | ADRBK1, CEBPA, DGAT1, ENPP1, GNB3, HTR6, IGF1, IGF1R, LEP, MMP2, PLA2G16, PNPLA1, PNPLA5, STAT3, TBC1D1, VDR                                                                                                                                                                                                       |
| miR-126-3p  | APOA5                                                                                                                                                                                                                                                                                                              |
| miR-133a-3p | GALR1, GM2A, MMP14, SLC27A4                                                                                                                                                                                                                                                                                        |
| miR-143-3p  | ADRB2, AZGP1, BMPR1A, CHRNA2, ENPP1, FAM71F1, GNB3, GOT1, HTR2C, IL18, LPIN1, NQO1, NTRK2, NUA2, PPARG, SERPINE1, SLC27A4, SREBF1, TUB                                                                                                                                                                             |
| miR-146a-5p | ADAM17, GAD2, NMU, NTRK2, PTPN1, SCD, TMEM18                                                                                                                                                                                                                                                                       |
| miR-155-5p  | CEBPB, CETP, GNAS, GOT1, IAPP, INSIG2, MAP3K5, NR1H3, OPRM1, PMCH, TCF7L2                                                                                                                                                                                                                                          |
| miR-181a-5p | AQP9, AR, CIDEA, EGFL6, F11R, FDFT1, IL1A, IRLN1, LEPR, LMNA, MAOA, MAPK1, NOS1AP, NOS3, NPFFR2, NR3C1, PCSK1, PRKAA1, SIRT1, STEAP4, TBC1D1, TCF7L2, TWIST1, WNT5B                                                                                                                                                |
| miR-195-5p  | ADRBK1, ALOX12, APLN, APOC3, ATXN2, CCDC80, FASN, HNF1A, HTR2A, MAF, RNF216                                                                                                                                                                                                                                        |
| miR-199a-5p | ADIPOR1, CAPN3, CEBPB, CLOCK, CRT3, CXCL5, F11R, FAM71F1, GGT1, HTR2A, IGF1R, IL6, IRS1, LMNA, PCK1, RNF216, SLC25A13, SLC27A4, SLC2A4, TNF, TNMD, TRIB3, TRPV1, UBL5, VCAM1                                                                                                                                       |
| miR-210-3p  | FASN, GJA4, INHBB, ITGAX, TWIST1                                                                                                                                                                                                                                                                                   |
| miR-221-3p  | ATF3, BBS4, CNR1, MTR, PCSK1, SORT1, VCAM1, XBP1                                                                                                                                                                                                                                                                   |
| miR-499a-5p | GCG, KLF7, MAF, NR3C1, NRXN3, SCG5                                                                                                                                                                                                                                                                                 |
| miR-574-3p  | CIDEA, HK1, LEP, MMP3, PPARGC1B                                                                                                                                                                                                                                                                                    |

**Supplementary Table S2:** A list of predicted targets of appropriate microRNAs dysregulated in whole peripheral blood of children descending from GDM complicated pregnancies in relation to hypertension using miRWalk2.0 database (putative microRNA binding sites predicted by miRWalk algorithm within mRNA selected regions).

| microRNA | Predicted targets - HYPERTENSION |
|----------|----------------------------------|
|----------|----------------------------------|

|             |                                                                                                                                                                                                                                                                                                                                                         |
|-------------|---------------------------------------------------------------------------------------------------------------------------------------------------------------------------------------------------------------------------------------------------------------------------------------------------------------------------------------------------------|
| miR-1       | ACSM3, ARG2, BDNF, CCL2, DRD1, EDN1, KCNA5, KCNMA1, LTA, MEX3C, NR3C1, PTPN1, SLC6A19, SLC8A1, SLC01B1, TTR                                                                                                                                                                                                                                             |
| miR-16-5p   | ALOX12, APLN, ATP2A2, CTH, CXCL10, GHR, HTR2A, KL, NISCH, P2RY2, SGK1, SLC12A2, VEGFA, XDH                                                                                                                                                                                                                                                              |
| miR-17-5p   | ACVRL1, ADORA2B, ADRA1A, APEX1, ATP2A2, ATP2B1, BMP7, BMPR2, CASP8, CD36, CX3CL1, CYP4F2, ECE1, FLT1, GSTM3, HIF1A, HTR2A, IAPP, IL10, IL23R, KCNMA1, KDR, KLC1, KYNU, LEP, MMP2, MTHFR, NOS1, NOX4, OPTN, PPARA, PRCP, PTGIS, RGS2, ROCK2, SELP, SERPINE1, SLC22A3, SLC26A4, SLC2A5, SLC6A4, SLC6A9, SMAD5, SREBF1, STAT3, TNFRSF1B, TRPM6, VEGFA, XDH |
| miR-20a-5p  | ABCA1, ATP1A2, CD36, CYP3A5, DRD1, ERAP1, ESR1, F3, FLT1, FMO3, GUCY1A3, HTR2A, MFN2, MMP3, NOX1, RLN1, SLC12A3, SLC22A2, SMAD1, TGFB2, TRPC4, TTR                                                                                                                                                                                                      |
| miR-20b-5p  | ACVRL1, ADORA2B, ADRA1A, APEX1, ATP2A2, ATP2B1, BMP7, BMPR2, CASP8, CD36, CX3CL1, CYP4F2, ECE1, FLT1, GSTM3, HIF1A, HTR2A, IAPP, IL10, IL23R, KCNMA1, KDR, KLC1, KYNU, LEP, MMP2, MTHFR, NOS1, NOX4, OPTN, PPARA, PRCP, PTGIS, RGS2, ROCK2, SELP, SERPINE1, SLC22A3, SLC26A4, SLC2A5, SLC6A4, SLC6A9, SMAD5, SREBF1, STAT3, TNFRSF1B, TRPM6, VEGFA, XDH |
| miR-21-5p   | CXCL10, EDNRB, KLF5, PPARA, THPO                                                                                                                                                                                                                                                                                                                        |
| miR-23a-3p  | ABCA1, ADORA2B, ARG1, ATP1A1, CXCL12, EDNRB, HSD11B1, IGF1, KLF5, MAPK14, MBL2, PRCP, TRPM6, ZNF652                                                                                                                                                                                                                                                     |
| miR-26a-5p  | ADM, ATP1A2, CALCRL, CCL2, CTH, ENG, ESR1, FLT1, HGF, HLA-A, IER3, IL6, NOS1, PCNA, PIM1, PON1, PTGS2, PTX3, ROBO4, SELP, SLC12A2, SLC04C1, SMAD1, STK39, TAP1, TRPC3, TRPC4, WNK1, XDH, ZNF652                                                                                                                                                         |
| miR-29a-3p  | APLNR, CASP8, CXCL10, IGF1, KNG1, LEP, LPL, NOS2, SDK1, SGK1, VEGFA, XPNPEP1                                                                                                                                                                                                                                                                            |
| miR-92a-3p  | ADRB1, ATP2A2, CCR2, CHGA, CST3, CYBA, GNB3, GSTA1, IL23R, NOX4, PEPD, PIK3R1, SLC9A1, STEAP4, TRPC4                                                                                                                                                                                                                                                    |
| miR-103a-3p | ADRA1A, ADRB2, ALAD, ALOX12, APLN, BDNF, CD40, CHGA, CRP, CYP2C9, DRD1, EDNRB, FURIN, HSPA1B, HTR2A, KLC1, LIPE, MFN2, MLYCD, MMP3, NISCH, NOS1, RNLS, ROBO4, SLC22A2, SLC6A2, SLC7A1, SLC04C1, TGFB3, UCP2, UMOD, VWF, XDH                                                                                                                             |
| miR-125b-5p | ADRA1A, ANPEP, BDKRB2, BMPR1B, CCR2, CCR5, CYP11B2, EMILIN1, ENPEP, ENPP1, EPO, GNB3, KCNK3, LEP, MLYCD, MMP2, PSMB9, ROBO4, STAT3                                                                                                                                                                                                                      |
| miR-133a-3p | ADORA2B, ALAD, CHGB, CXCL12, GOSR2, KCNMA1, KYNU, MAPK14, PEPD, SCG2, SLC22A2                                                                                                                                                                                                                                                                           |
| miR-143-3p  | ADRB2, ARHGEF1, CCR2, CD40, CYP11B1, CYP1A2, CYP2C9, ENPP1, EPO, FGB, GHR, GNB3, IER3, IL18, KLF5, NFKBIL1, PDE5A, SERPINC1, SERPINE1, SLC12A3, SREBF1, UMOD, VNN1, ZNF652                                                                                                                                                                              |
| miR-146a-5p | CAT, CFH, CYP11A1, HSPA1A, INPPL1, KCNK3, KCNMA1, NOS1, NOX4, PRCP, PTGS2, PTPN1, RHOA, THPO, WISP1, WNK4, ZNF652                                                                                                                                                                                                                                       |
| miR-155-5p  | ADRA1A, ARG1, CD36, CETP, DRD1, GNAS, IAPP, NPPA, SMAD1, ZNF652                                                                                                                                                                                                                                                                                         |
| miR-181a-5p | AR, ATP1B1, ATP2B1, AVPR1A, CACNB2, CASP8, CTH, CYP4F2, EDNRA, F11R, F3, GREM1, HSD3B1, IL1A, KCNMA1, KL, LEPR, MAOA, MAPK1, NOS3, NR3C1, PTGS2, SLC7A1, SOD3, STEAP4, TGFB2, VIP, WISP1, ZNF652                                                                                                                                                        |
| miR-195-5p  | ALOX12, APLN, ATP2A2, CTH, CXCL10, GHR, HTR2A, KL, NISCH, P2RY2, SGK1, SLC12A2, VEGFA, XDH                                                                                                                                                                                                                                                              |
| miR-199a-5p | CCR2, CHGA, CSK, DDAH2, F11R, GGT1, HTR2A, IL6, MAT1A, MMP9, PTGIS, SCG2, TNC, TNF, VCAM1                                                                                                                                                                                                                                                               |
| miR-210-3p  | ATP2A2, BDKRB2, IER3, NR3C2                                                                                                                                                                                                                                                                                                                             |
| miR-221-3p  | ATP1A1, CD36, KLC1, MTR, RNLS, VCAM1                                                                                                                                                                                                                                                                                                                    |
| miR-499a-5p | CACNB2, CLU, CYP3A4, FLT1, GUCY1A3, NR3C1, SLC12A2, SLC22A8                                                                                                                                                                                                                                                                                             |
| miR-574-3p  | ID2, LEP, MMP3, NISCH, ZNF652                                                                                                                                                                                                                                                                                                                           |



**Supplementary Table S3:** A list of predicted targets of appropriate microRNAs dysregulated in whole peripheral blood of children descending from GDM complicated pregnancies in relation to glucose intolerance using miRWalk2.0 database (putative microRNA binding sites predicted by miRWalk algorithm within mRNA selected regions).

| <b>microRNA</b> | <b>Predicted targets – GLUCOSE INTOLERANCE</b> |
|-----------------|------------------------------------------------|
| miR-16-5p       | HNF1A                                          |
| miR-17-5p       | CD36, HFE, PPARD, TNFRSF1B                     |
| miR-20a-5p      | CD36, SLC2A4                                   |
| miR-20b-5p      | CD36, HFE, PPARD, TNFRSF1B                     |
| miR-23a-3p      | HSD11B1                                        |
| miR-26a-5p      | NAMPT                                          |
| miR-29a-3p      | NEUROG3, TNFRSF1A                              |
| miR-103a-3p     | NEUROG3, PRKCZ, TNMD                           |
| miR-125b-5p     | ENPP1                                          |
| miR-143-3p      | ENPP1, GOT1, PPARD                             |
| miR-146a-5p     | CFH, INPPL1                                    |
| miR-155-5p      | CD36, GOT1, TCF7L2                             |
| miR-181a-5p     | NOS3, TCF7L2                                   |
| miR-195-5p      | HNF1A                                          |
| miR-199a-5p     | GGT1, SLC2A4, TNMD                             |
| miR-221-3p      | CD36                                           |
| miR-499a-5p     | GCG, SCG5                                      |
| miR-574-3p      | AGER, PRKCZ                                    |

**Supplementary Table S4:** A list of predicted targets of appropriate microRNAs dysregulated in whole peripheral blood of children descending from GDM complicated pregnancies in relation to lipid metabolism disease using miRWalk2.0 database (putative microRNA binding sites predicted by miRWalk algorithm within mRNA selected regions).

| <b>microRNA</b> | <b>Predicted targets – LIPID METABOLISM DISEASE</b> |
|-----------------|-----------------------------------------------------|
| miR-17-5p       | PNPLA2                                              |
| miR-20b-5p      | PNPLA2                                              |

**Supplementary Table S5:** A list of predicted targets of appropriate microRNAs dysregulated in whole peripheral blood of children descending from GDM complicated pregnancies in relation to type 2 diabetes using miRWalk2.0 database (putative microRNA binding sites predicted by miRWalk algorithm within mRNA selected regions).

| <b>microRNA</b> | <b>Predicted targets – TYPE 2 DIABETES</b> |
|-----------------|--------------------------------------------|
| miR-1           | CD28                                       |
| miR-16-5p       | FASN                                       |
| miR-17-5p       | CD28, CD36, FXN, PPARA, SERPINE1           |
| miR-20a-5p      | CD36                                       |
| miR-20b-5p      | CD28, CD36, FXN, PPARA, SERPINE1           |
| miR-21-5p       | PPARA                                      |
| miR-23a-3p      | FASN                                       |
| miR-26a-5p      | NAMPT                                      |
| miR-103a-3p     | FASN, VWF                                  |
| miR-133a-3p     | CD28                                       |
| miR-143-3p      | CD28, SERPINE1, FXN                        |
| miR-155-5p      | CD36                                       |
| miR-181a-5p     | LEPR                                       |
| miR-195-5p      | FASN                                       |
| miR-210-3p      | FASN                                       |
| miR-221-3p      | CD36                                       |

**Supplementary Table S6:** A list of predicted targets of appropriate microRNAs dysregulated in whole peripheral blood of children descending from GDM complicated pregnancies in relation to heart septal defect using miRWalk2.0 database (putative microRNA binding sites predicted by miRWalk algorithm within mRNA selected regions).

| microRNA    | Predicted targets – HEART SEPTAL DEFECT |
|-------------|-----------------------------------------|
| miR-16-5p   | VEGFA                                   |
| miR-17-5p   | BMPR2, MTHFR, VEGFA                     |
| miR-20b-5p  | BMPR2, MTHFR, VEGFA                     |
| miR-21-5p   | RTN4                                    |
| miR-29a-3p  | TLL1, VEGFA                             |
| miR-92a-3p  | ACTC1                                   |
| miR-143-3p  | CRELD1                                  |
| miR-155-5p  | NPPA, PTPN11                            |
| miR-181a-5p | TLL1                                    |
| miR-195-5p  | VEGFA                                   |

**Supplementary Table S7:** A list of predicted targets of appropriate microRNAs dysregulated in whole peripheral blood of children descending from GDM complicated pregnancies in relation to heart valve disease using miRWalk2.0 database (putative microRNA binding sites predicted by miRWalk algorithm within mRNA selected regions).

| microRNA    | Predicted targets – HEART VALVE DISEASE |
|-------------|-----------------------------------------|
| miR-133a-3p | VKORC1                                  |

**Supplementary Table S8:** A list of predicted targets of appropriate microRNAs dysregulated in whole peripheral blood of children descending from GDM complicated pregnancies in relation to heart disease using miRWalk2.0 database (putative microRNA binding sites predicted by miRWalk algorithm within mRNA selected regions).

| microRNA    | Predicted targets – HEART DISEASE                                                                                              |
|-------------|--------------------------------------------------------------------------------------------------------------------------------|
| miR-1       | CCL2, CDKN2B, CNDP1, CPB2, EDN1, ENTPD1, FN1, LTA, MMP8, SELPLG                                                                |
| miR-16-5p   | APOC3, CXCL10, GHR, HNF1A, HTR4, PTH, VEGFA                                                                                    |
| miR-17-5p   | ANGPTL4, ATXN1, CD36, CX3CL1, HFE, HIF1A, IL10, IL1R1, KDR, LDLR, LEP, LIMS1, MMP2, MTHFR, NR1H3, PPARA, SELP, SERPINE1, VEGFA |
| miR-20a-5p  | ABCA1, CD36, ESR1, F3, HSPA8, IL8, LIMS1, MMP3, MTHFD1L, NPC1                                                                  |
| miR-20b-5p  | ANGPTL4, ATXN1, CD36, CX3CL1, HFE, HIF1A, IL10, IL1R1, KDR, LDLR, LEP, LIMS1, MMP2, MTHFR, NR1H3, PPARA, SELP, SERPINE1, VEGFA |
| miR-21-5p   | CXCL10, EDNRB, PPARA, TLR4                                                                                                     |
| miR-23a-3p  | ABCA1, APOA5, CBS, EDNRB, ENTPD1, FCAR, IFNG, IGF1, IL8, MAPK14, MBL2, NPC1, SELPLG, TLR4                                      |
| miR-26a-5p  | CBS, CCL2, CRP, ESR1, FCAR, HSPA8, HTR4, IFNG, IL6, MTPP, PON1, SELP                                                           |
| miR-29a-3p  | CXCL10, FCGR2A, IGF1, LEP, VEGFA                                                                                               |
| miR-92a-3p  | CCR2, CNDP1, CPE, CYBA, DUSP1, GP6, IFNG, KAT2B, NPC1                                                                          |
| miR-100-5p  | CXCL16                                                                                                                         |
| miR-103a-3p | CRP, CYP2C9, EDNRB, HTR4, MMP3, NOD1, PTH, SELPLG, VAMP8, VWF                                                                  |
| miR-125b-5p | ATXN1, CCR2, CCR5, CEBPA, ENPP1, EPO, IGFBP3, LBH, LEP, MMP2, SCARB1, SELPLG, TNFSF4, VAMP8                                    |
| miR-126-3p  | APOA5                                                                                                                          |
| miR-133a-3p | CPB2, FN1, KCND3, MAPK14, MMP14, SUMO1, VKORC1                                                                                 |
| miR-143-3p  | ALB, CCR2, CPB2, CYP2C9, ENPP1, EPO, GHR, IFNG, IL18, KCND3, MGP, NFATC1, NQO1, SELL, SERPINE1                                 |
| miR-146a-5p | ALOX5AP, CFH, ENTPD1, TFAP2B                                                                                                   |
| miR-155-5p  | CD36, CETP, NR1H3, PTPN11, TCF7L2                                                                                              |

|             |                                                                         |
|-------------|-------------------------------------------------------------------------|
| miR-181a-5p | EDNRA, F3, IL1A, IL1R1, KAT2B, LMNA, MMP8, NOS3, PON3, SOD3, TCF7L2     |
| miR-195-5p  | APOC3, CXCL10, GHR, HNF1A, HTR4, PTH, VEGFA                             |
| miR-199a-5p | CCR2, CXCL16, CXCR6, GGT1, GP6, HTR4, IGFBP3, IL6, LMNA, MMP9, TNC, TNF |
| miR-221-3p  | CD36, LIMS1                                                             |
| miR-499a-5p | CYP3A4, ENTPD1, HSPA8, NPC1L1                                           |
| miR-574-3p  | AGER, LEP, MMP3, NFATC1                                                 |

**Supplementary Table S9:** A list of predicted targets of appropriate microRNAs dysregulated in whole peripheral blood of children descending from GDM complicated pregnancies in relation to heart failure using miRWalk2.0 database (putative microRNA binding sites predicted by miRWalk algorithm within mRNA selected regions).

| microRNA    | Predicted targets – HEART FAILURE                                                                                                                 |
|-------------|---------------------------------------------------------------------------------------------------------------------------------------------------|
| miR-1       | EDN1, GJA1 JPH2, PPP1R1A, RAMP3, SFTPB, TTR                                                                                                       |
| miR-16-5p   | APLN, ATP2A2, HTR4, KCNE1, NISCH, PPP1R2, PPRC1, VEGFA                                                                                            |
| miR-17-5p   | ADRA1A, ADRA1B, ATP2A2, BVES, CFLAR, CNR2, DYRK1A, ERBB2, GJA1, HFE, IL10, IL5, LEP, LRG1, MMP2, NOS1, OPA1, SLC6A4, SPP1, TPM1, UNC93B1, VEGFA   |
| miR-20a-5p  | ADRA1B, F3, HDAC4, PTHLH, SLC2A4, STC1, TTR, ZFPM2                                                                                                |
| miR-20b-5p  | ADRA1A, ADRA1B, ATP2A2, BVES, CFLAR, CNR2, DYRK1A, ERBB2, GJA1, HFE, IL10, IL5, LEP, LRG1, MMP2, NOS1, OPA1, SLC6A4, SPP1, TPM1, UNC93B1, VEGFA   |
| miR-21-5p   | CFLAR, EDNRB, IL9, KCNH2, LAMA4, RTN4, TLR4, TPM1                                                                                                 |
| miR-23a-3p  | CFLAR, EDNRB, FOXP1, IFNG, IGF1, MAP4, MAPK14, MBL2, NRG1, PROM1, RAMP3, RYR2, TLR4                                                               |
| miR-26a-5p  | ADM, CALCRL, CRP, FRMD4B, HGF, HTR4, IFNG, IL6, NOS1, NRG1, SFTPB, TRPC3, UGT1A1                                                                  |
| miR-29a-3p  | BDKRB1, IGF1, IL1RL1, LEP, TNFRSF1A, TPM1, VEGFA                                                                                                  |
| miR-92a-3p  | ADRB1, ATP2A2, CCR2, CHGA, CST3, CYBA, DUSP1, GNB3, GRK5, IFNG, IL1RL1, JPH2, RAPGEF3, SLC9A1                                                     |
| miR-100-5p  | CXCL16                                                                                                                                            |
| miR-103a-3p | ADRA1A, ADRA1B, ADRB2, APLN, CHGA, CRP, CYP27B1, EDNRB, ESRRA, FKBP1B, HSPA1B, HTR4, MAP4, NISCH, NOL3, NOS1, NPR2, NRG1, PTHLH, SFTPB, UCP2, VWF |
| miR-125b-5p | ADRA1A, BSG, CCR2, CD34, CEBPA, CYP11B2, ERBB2, ESRRA, GNB3, LAMA4, LEP, MMP2, MYL9                                                               |
| miR-126-3p  | KCNE1                                                                                                                                             |
| miR-133a-3p | CYP27B1, FOXC1, KCNE1, MAPK14, PARP1                                                                                                              |
| miR-143-3p  | ADRB2, CCR2, CNR2, FOXO1, GATM, GNB3, IFNG, IL18, PDE5A, SFTPB                                                                                    |
| miR-146a-5p | BSG, CYP27B1, NOS1, PPP1R1A, STC1, TPM1                                                                                                           |
| miR-155-5p  | ADRA1A, GATM, NPPA, NRG1, PDK1                                                                                                                    |
| miR-181a-5p | EDNRA, F3, FOXP1, GATM, LEPR, LMNA, NOS3, PPP1R2, SOD3                                                                                            |
| miR-195-5p  | APLN, ATP2A2, HTR4, KCNE1, NISCH, PPP1R2, PPRC1, VEGFA                                                                                            |
| miR-199a-5p | CCR2, CHGA, CXCL16, ERBB2, FKBP1B, HTR4, IL6, KCNH2, KLF15, LMNA, LRG1, MAP4, MMP9, PPP1R2, SFTPB, SLC2A4, TNF, VCAM1                             |
| miR-210-3p  | ATP2A2                                                                                                                                            |
| miR-221-3p  | PPP1R2, THBS1, TIMP4, VCAM1, ZFPM2                                                                                                                |
| miR-499a-5p | IL1RL1, TIMP4                                                                                                                                     |
| miR-574-3p  | AGER, LEP, NISCH, SRF                                                                                                                             |

**Supplementary Table S10:** A list of predicted targets of appropriate microRNAs dysregulated in whole peripheral blood of children descending from GDM complicated pregnancies in relation to venous insufficiency using miRWalk2.0 database (putative microRNA binding sites predicted by miRWalk algorithm within mRNA selected regions).

| <b>microRNA</b> | <b>Predicted targets – VENOUS INSUFFICIENCY</b> |
|-----------------|-------------------------------------------------|
| miR-1           | P2RX5                                           |
| miR-17-5p       | CCL5, P2RX5, SERPINE1                           |
| miR-20b-5p      | CCL5, P2RX5, SERPINE1                           |
| miR-29a-3p      | P2RX5                                           |
| miR-100-5p      | P2RX5                                           |
| miR-125b-5p     | P2RX5                                           |
| miR-143-3p      | SERPINE1                                        |
| miR-146a-5p     | CCL5                                            |
| miR-199a-5p     | P2RX5                                           |

**Supplementary Table S11:** A list of predicted targets of appropriate microRNAs dysregulated in whole peripheral blood of children descending from GDM complicated pregnancies in relation to pulmonary embolism using miRWalk2.0 database (putative microRNA binding sites predicted by miRWalk algorithm within mRNA selected regions).

| <b>microRNA</b> | <b>Predicted targets – PULMONARY EMBOLISM</b> |
|-----------------|-----------------------------------------------|
| miR-1           | CPB2                                          |
| miR-17-5p       | MTHFR                                         |
| miR-20a-5p      | F3                                            |
| miR-20b-5p      | MTHFR                                         |
| miR-26a-5p      | CRP                                           |
| miR-103a-3p     | CRP                                           |
| miR-133a-3p     | CPB2                                          |
| miR-143-3p      | ALB, CPB2                                     |
| miR-155-5p      | NPPA                                          |
| miR-181a-5p     | F3                                            |
| miR-199a-5p     | SERPINF2                                      |
